# Supplementary material
Source: PubMed Central journal article supplement (PMC4538429)
Supplement: ml5b00126_si_001.pdf [file ml5b00126_si_001.pdf]

# Modulation of the interaction between a peptide ligand and a G protein-coupled receptor by halogen atoms

## Supporting Information

Mònica Rosa,<sup>†,∇</sup> Gianluigi Caltabiano,<sup>#,∇</sup> Katy Barreto-Valer,<sup>‡,§</sup> Verónica Gonzalez-Nunez,<sup>‡,§</sup> José C. Gómez-Tamayo,<sup>#</sup> Ana Arda,<sup>//,⊥</sup> Jesús Jiménez-Barbero,<sup>//,⊥</sup> Leonardo Pardo,<sup>\*,#</sup> Raquel E. Rodríguez,<sup>‡,§</sup> Gemma Arsequell,<sup>†</sup> and Gregorio Valencia<sup>\*,†</sup>

<sup>†</sup>Institut de Química Avançada de Catalunya (I.Q.A.C.-C.S.I.C.), E-08034 Barcelona, Spain

<sup>‡</sup>Laboratori de Medicina Computacional, Unitat de Bioestadística, Facultat de Medicina, Universitat Autònoma de Barcelona, E-08193, Bellaterra, Barcelona, Spain.

<sup>‡</sup>Department of Biochemistry and Molecular Biology, Faculty of Medicine, Instituto de Neurociencias de Castilla y León (INCyL), University of Salamanca, E-37008 Salamanca, Spain.

<sup>§</sup>Institute of Biomedical Research of Salamanca (IBSAL), E-37007 Salamanca, Spain.

<sup>//</sup> CIC bioGUNE, Bizkaia Technological Park, E-48160 Derio, Spain.

<sup>⊥</sup>Ikerbasque, Basque Foundation for Science, E-48013 Bilbao, Spain

<sup>∇</sup>These authors (M.R. and G.C.) contributed equally to this work.

### *Correspondence to:*

Dr. Leonardo Pardo. Laboratori de Medicina Computacional, Unitat de Bioestadística, Facultat de Medicina, Universitat Autònoma de Barcelona, E-08193 Bellaterra, Barcelona, Spain.  
e-mail: leonardo.pardo@uab.es.

Dr. Gregorio Valencia, Instituto de Química Avançada de Catalunya (IQAC-CSIC), Jordi Girona 18-26, E08034-Barcelona (Spain); Ph.: +34934006113; Fax: +34932045904;  
e-mail: gregorio.valencia@iqac.csic.es.

## Table of contents

|                                                            | Page |
|------------------------------------------------------------|------|
| Endomorphin and Leu-enkephalin analogues                   | S2   |
| Nomenclature: Endomorphin and Leu-enkephalin analogues     | S3   |
| Computational studies                                      | S5   |
| NMR studies                                                | S12  |
| Biological studies. Competition binding assays             | S13  |
| General procedure for Solid Phase Peptide Synthesis (SPPS) | S16  |
| Synthesis and characterization of peptides                 | S17  |
| HRMS (UPLC-TOF/MS)                                         | S24  |
| HPLC                                                       | S30  |

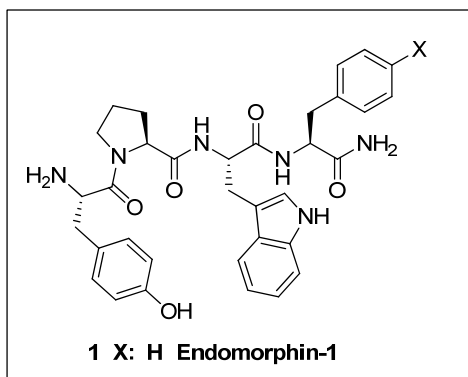

- 2 X: F [4-F-Phe<sup>4</sup>]-Endo-1  
 3 X: Cl [4-Cl-Phe<sup>4</sup>]-Endo-1  
 4 X: Br [4-Br-Phe<sup>4</sup>]-Endo-1  
 5 X: I [4-I-Phe<sup>4</sup>]-Endo-1

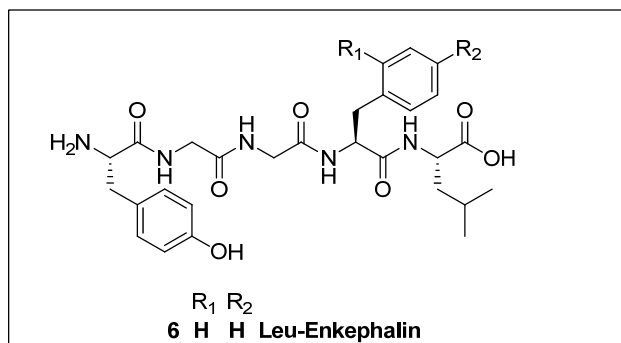

**[2-X-Phe<sup>4</sup>]-Leu-ENK**

R<sub>1</sub> R<sub>2</sub>

**[4-X-Phe<sup>4</sup>]-Leu-ENK**

R<sub>1</sub> R<sub>2</sub>

- |                                         |                                          |
|-----------------------------------------|------------------------------------------|
| 7 F H [2-F-Phe <sup>4</sup> ]-Leu-ENK   | 11 H F [4-F-Phe <sup>4</sup> ]-Leu-ENK   |
| 8 Cl H [2-Cl-Phe <sup>4</sup> ]-Leu-ENK | 12 H Cl [4-Cl-Phe <sup>4</sup> ]-Leu-ENK |
| 9 Br H [2-Br-Phe <sup>4</sup> ]-Leu-ENK | 13 H Br [4-Br-Phe <sup>4</sup> ]-Leu-ENK |
| 10 I H [2-I-Phe <sup>4</sup> ]-Leu-ENK  | 14 H I [4-I-Phe <sup>4</sup> ]-Leu-ENK   |

## Scheme S1: Endomorphin and Leu-enkephalin analogues

### Nomenclature

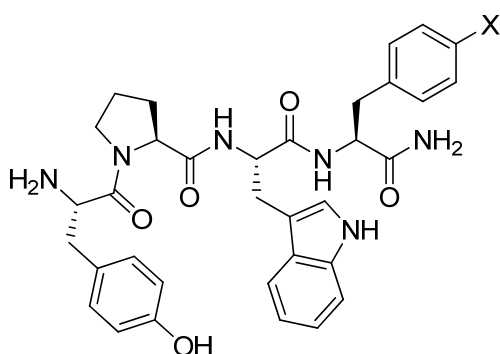

**Scheme S2.** Family of halogenated Endomorphin-1 analogues synthesized.

| Peptide | X  | Name                            | PEPTIDE                                          |
|---------|----|---------------------------------|--------------------------------------------------|
| 1       | H  | Endomorphin-1                   | H-Tyr-Pro-Trp-Phe-NH <sub>2</sub>                |
| 2       | F  | [4-F-Phe <sup>4</sup> ]-Endo-1  | H-Tyr-Pro-Trp-( <b>4-F</b> )Phe-NH <sub>2</sub>  |
| 3       | Cl | [4-Cl-Phe <sup>4</sup> ]-Endo-1 | H-Tyr-Pro-Trp-( <b>4-Cl</b> )Phe-NH <sub>2</sub> |
| 4       | Br | [4-Br-Phe <sup>4</sup> ]-Endo-1 | H-Tyr-Pro-Trp-( <b>4-Br</b> )Phe-NH <sub>2</sub> |
| 5       | I  | [4-I-Phe <sup>4</sup> ]-Endo-1  | H-Tyr-Pro-Trp-( <b>4-I</b> )Phe-NH <sub>2</sub>  |

**Table S1.** Family of halogenated Endomorphin-1 analogues synthesized.

## Nomenclature

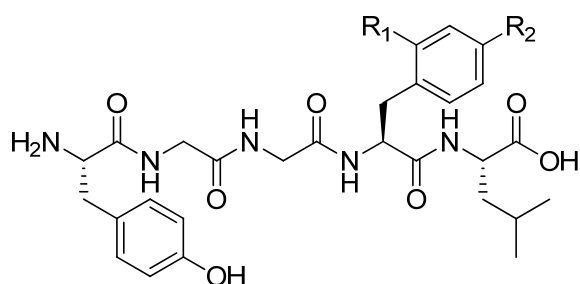

**Scheme S3.** Family of halogenated Leu-Enkephalin analogues synthesized.

| Peptide | R <sub>1</sub> | R <sub>2</sub> | Name                             | PEPTIDES                                |
|---------|----------------|----------------|----------------------------------|-----------------------------------------|
| 6       | H              | H              | Leu-Enkephalin                   | H-Tyr-Gly-Gly-Phe-Leu-OH                |
| 7       | F              | H              | [2-F-Phe <sup>4</sup> ]-Leu-ENK  | H-Tyr-Gly-Gly-( <b>2-F</b> )Phe-Leu-OH  |
| 8       | Cl             | H              | [2-Cl-Phe <sup>4</sup> ]-Leu-ENK | H-Tyr-Gly-Gly-( <b>2-Cl</b> )Phe-Leu-OH |
| 9       | Br             | H              | [2-Br-Phe <sup>4</sup> ]-Leu-ENK | H-Tyr-Gly-Gly-( <b>2-Br</b> )Phe-Leu-OH |
| 10      | I              | H              | [2-I-Phe <sup>4</sup> ]-Leu-ENK  | H-Tyr-Gly-Gly-( <b>2-I</b> )Phe-Leu-OH  |
| 11      | H              | F              | [4-F-Phe <sup>4</sup> ]-Leu-ENK  | H-Tyr-Gly-Gly-( <b>4-F</b> )Phe-Leu-OH  |
| 12      | H              | Cl             | [4-Cl-Phe <sup>4</sup> ]-Leu-ENK | H-Tyr-Gly-Gly-( <b>4-Cl</b> )Phe-Leu-OH |
| 13      | H              | Br             | [4-Br-Phe <sup>4</sup> ]-Leu-ENK | H-Tyr-Gly-Gly-( <b>4-Br</b> )Phe-Leu-OH |
| 14      | H              | I              | [4-I-Phe <sup>4</sup> ]-Leu-ENK  | H-Tyr-Gly-Gly-( <b>4-I</b> )Phe-Leu-OH  |

**Table S2.** Family of halogenated Leu-Enkephalin analogues synthesized.

## Computational studies

*Molecular models of peptide-receptor complexes.* Modeller 9v8<sup>1</sup> was used to model zebrafish  $\mu$ -opioid receptors using the crystal structure of mouse  $\mu$ -opioid receptor (PDB 4DKL)<sup>2</sup> as a template. The alignment of both sequences (85% of identity and 89% of similarity) is shown in Figure S2. Similarly, zebrafish  $\delta$ 1b-opioid receptor was modeled from human  $\delta$ -opioid receptor (PDB 4N6H)<sup>3</sup>. These receptors share 87% of sequence identity and 89% of sequence similarity (Figure S2). No significant structural differences among the models obtained with Modeller were observed, given the high level of sequence identity and similarity between target and template. Thus, the model with the lowest energy was selected. The extended conformation of Endo-1 and LeuENK, together with the conformational restraint determined by NMR, were docked into the homology models using the Autodock Vina tool.<sup>4</sup> All docking solutions were visually inspected and the poses in which the *N*-terminus amine of the peptide forms an ionic interaction with Asp3.32 and Tyr<sup>1</sup> interacts with a conserved water molecule, as observed in crystal structures of opioid receptors in complex with non-peptidic ligands, were selected for energy minimization and MD simulations. In a second step, these complexes were embedded in a lipid bilayer (358 molecules of POPC) with explicit solvent (30,858 water molecules) and counterions (155 Na<sup>+</sup> and 169 Cl<sup>-</sup>). Model systems were energy minimized and subsequently subjected to a 1 ns MD equilibration, with positional restraints on the C $\alpha$  atoms of the receptor, to remove possible voids present in protein/lipids or protein/water interfaces. These restraints were released and 100 ns MD trajectories were produced at constant pressure and temperature, using the particle mesh Ewald method to evaluate electrostatic interactions with the GROMACS software<sup>5</sup> v4.53, the AMBER99SB force field for the amino acids, and Berger parameters for POPC lipids, using the protocol previously described.<sup>6</sup> Cl, Br, and I were modeled following the procedure proposed by Ibrahim<sup>7</sup>, which consists in adding a positively charged particle (extra-point) on the opposite side of the C—X axis in order to reproduce the  $\sigma$ -hole. The C—X parameters and charges were those proposed by Ibrahim<sup>7</sup> but the mass and Van der Waal's radius of the extra-point was set to 1 and 0, respectively. The stability of the peptide-receptor complexes was monitored by root-mean-square deviations (rmsd). The molecular electrostatic potential depicted in Figure S3 were calculated with GAUSSIAN 09<sup>8</sup> using the B3LYP level of theory and the 6-31g\*\* basis for F, Cl and Br and the lan12dz8 basis set for I.

### References:

- (1) Eswar, N.; Marti-Renom, M. A.; Webb, B.; Madhusudhan, M. S.; Eramian, D.; Shen, M.; Pieper, U.; Sali, A. **2006**. Comparative Protein Structure Modeling With MODELLER. Current Protocols in Bioinformatics, John Wiley & Sons, Inc., Supplement 15, pp. 5.6.1-5.6.30.
- (2) Manglik, A.; Kruse, A. C.; Kobilka, T. S.; Thian, F. S.; Mathiesen, J. M.; Sunahara, R. K.; Pardo, L.; Weis, W. I.; Kobilka, B. K.; Granier, S. Crystal structure of the  $\mu$ -opioid receptor bound to a morphinan antagonist. *Nature* **2012**, 485, 321-326.

- (3) Granier, S.; Manglik, A.; Kruse, A. C.; Kobilka, T. S.; Thian, F. S.; Weis, W. I.; Kobilka, B. K. Structure of the delta-opioid receptor bound to naltrindole, *Nature* **2012**, *485*, 400–404.
- (4) Trott, O.; Olson, A. J. AutoDock Vina: improving the speed and accuracy of docking with a new scoring function, efficient optimization, and multithreading. *J. Comput. Chem.* **2010**, *31*, 455–461.
- (5) Hess B.; Kutzner, C.; van der Spoel, D.; Lindahl, E. GROMACS 4: Algorithms for Highly Efficient, Load-Balanced, and Scalable Molecular Simulation. *J. Chem. Theory Comput.* **2008**, *4*, 435–447.
- (6) Cordoní, A.; Caltabiano, G.; Pardo, L. Membrane Protein Simulations Using AMBER Force Field and Berger Lipid Parameters. *J. Chem. Theory Comput.* **2012**, *8*, 948–958.
- (7) Ibrahim, M. A. A. Molecular mechanical study of halogen bonding in drug discovery. *J. Comput. Chem.* **2011**, *32*, 2564–2574.
- (8) Frisch, M. J.; Trucks, G. W.; Schlegel, H. B.; Scuseria, G. E.; Robb, M. A.; Cheeseman, J. R.; Scalmani, G.; Barone, V.; Mennucci, B.; Petersson, G. A.; Nakatsuji, H.; Caricato, M.; Li, X.; Hratchian, H. P.; Izmaylov, A. F.; Bloino, J.; Zheng, G.; Sonnenberg, J. L.; Hada, M.; Ehara, M.; Toyota, K.; Fukuda, R.; Hasegawa, J.; Ishida, M.; Nakajima, T.; Honda, Y.; Kitao, O.; Nakai, H.; Vreven, T.; Montgomery, J. A., Jr.; Peralta, J. E.; Ogliaro, F.; Bearpark, M.; Heyd, J. J.; Brothers, E.; Kudin, K. N.; Staroverov, V. N.; Kobayashi, R.; Normand, J.; Raghavachari, K.; Rendell, A.; Burant, J. C.; Iyengar, S. S.; Tomasi, J.; Cossi, M.; Rega, N.; Millam, J. M.; Klene, M.; Knox, J. E.; Cross, J. B.; Bakken, V.; Adamo, C.; Jaramillo, J.; Gomperts, R.; Stratmann, R. E.; Yazyev, O.; Austin, A. J.; Cammi, R.; Pomelli, C.; Ochterski, J. W.; Martin, R. L.; Morokuma, K.; Zakrzewski, V. G.; Voth, G. A.; Salvador, P.; Dannenberg, J. J.; Dapprich, S.; Daniels, A. D.; Farkas, Ö.; Foresman, J. B.; Ortiz, J. V.; Cioslowski, J.; Fox, D. J. Gaussian 09. Gaussian, Inc., Wallingford CT, 2009.

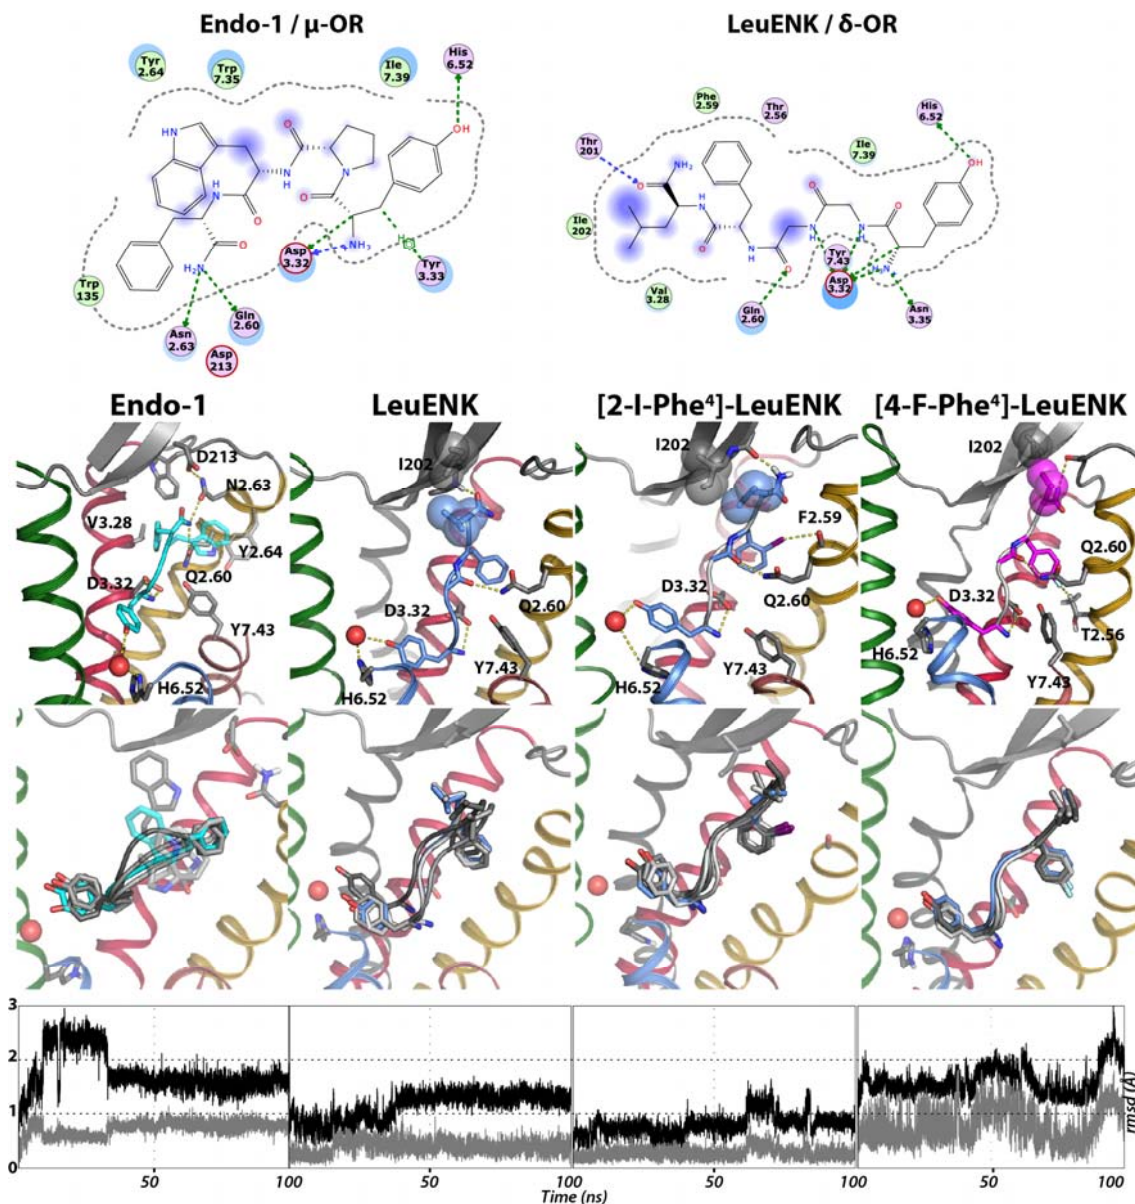

**Figure S1. Computational models of the complexes between Endo-1, LeuENK, [2-I-Phe<sup>4</sup>]-LeuENK and [4-F-Phe<sup>4</sup>]-LeuENK with  $\mu$ - and  $\delta$ <sub>B</sub>-opioid receptors.** The *message* part of all peptides interacts in a similar manner in both receptors. The protonated N-terminus amine of the peptide forms an ionic interaction with Asp<sub>3.32</sub>, whereas Tyr<sup>1</sup> interacts with His<sub>6.52</sub> via a conserved water molecule, present in all released crystal structures of opioid receptors (red spheres). The selective *address* part interacts differently in the two receptors. **Endo-1:** Trp<sup>3</sup> of Endo-1 (cyan) in complex with  $\mu$ -OR makes an aromatic-aromatic stacking interaction with Tyr<sub>2.64</sub> (in transparent) and Phe<sup>4</sup> is placed in a hydrophobic pocket created by Thr<sub>2.56</sub>, Phe<sub>2.59</sub>, Val<sub>3.38</sub>, and Trp<sub>127</sub> in ECL 1. The -CONH<sub>2</sub> C-terminus forms a  $\mu$ -specific hydrogen bond with Gln<sub>2.60</sub> and Asn<sub>2.63</sub>. In the complex between LeuENK and its halogenated forms (light blue and magenta) and  $\delta$ -ORs the Phe<sup>4</sup> is positioned in the same hydrophobic pocket as before, but with different conformation (see text and Figure 2D) while Leu<sup>5</sup> forms hydrophobic interactions with  $\delta$ -OR-specific Ile<sub>202</sub> in ECL 2, and the -CONH<sub>2</sub> C-terminus of the peptide hydrogen bonds with the exposed backbones of ECL<sub>2</sub>/ECL<sub>1</sub>. Schematic representations showing these interactions are shown (top). Representative snapshots (3 structures collected every 33 ns. plus the representative structures shown in first row) extracted from the molecular dynamics simulations of the peptide-receptor complexes are shown in middle panels (33ns in light gray, 66 ns in grey and 100ns in dark grey). Colored ligands are those shown in first row). The key proposed interactions remain stable

during the simulation. Root-mean-square deviations (rmsd) on peptides  $\alpha$ -carbons (in grey) and all atoms (in black) throughout the molecular dynamics simulations are shown in bottom panels. The colour code of the helices is TMs 1 in white, 2 in yellow, 3 in red, 4 in gray, 5 in green, 6 in blue, and 7 in brown.



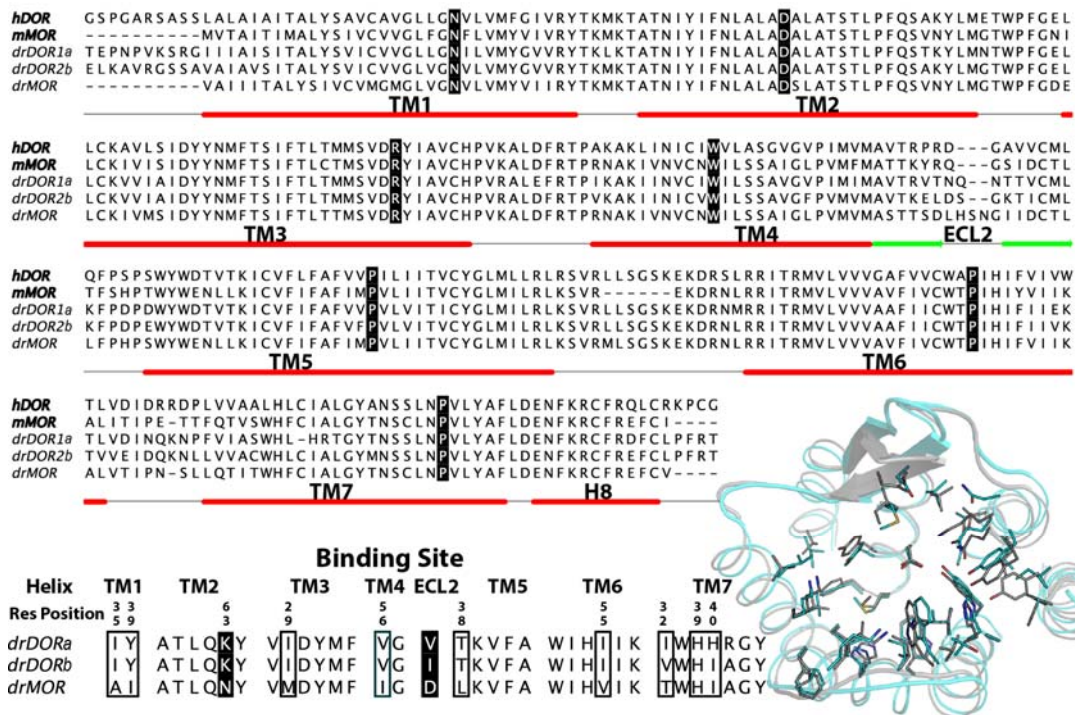

**Figure S2.** Sequence alignment of crystallized  $\delta$ -OR and  $\mu$ -OR (in bold) and danio rerio (*dr*)  $\delta$ a-OR,  $\delta$ b-OR and  $\mu$ -OR (upper panel). The highly conserved residues TM.50 (Ballesteros numbering scheme) are shown in black. Sequence alignment of the residues forming the binding site (lower panel). Non-conserved but similar residues are boxed while chemically different residues are shown in black. These residues are displayed in sticks in the right lower panel, where the superposition of *dr*- $\delta$ -OR and *dr*- $\mu$ -OR homology models (grey and cyan, respectively) is shown.

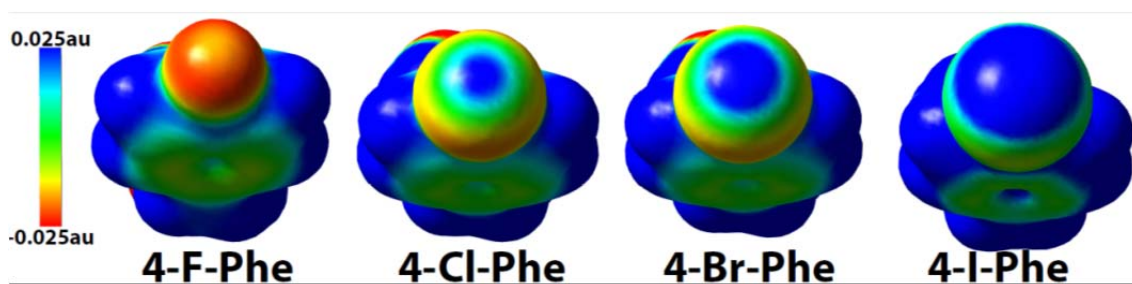

**Figure S3.** Electrostatic potential surfaces mapped on the surface of molecular electron density ( $0.02e \text{ au}^{-3}$ ) of *para* halogenated phenylalanine. The electrostatic potential shown varies between  $-0.025$  (red) and  $0.025$  (blue) au. These maps show the type and extension of the charge of the  $\sigma$ -hole: a hollow negative charge for F and a positive charge, which increase in size and intensity with the mass of the halogen, for Cl, Br and I. The molecular electrostatic potential were calculated with GAUSSIAN 09 using the B3LYP level of theory and the 6-31g\*\* basis for F, Cl and Br and the lanl2dz8 basis set for I.

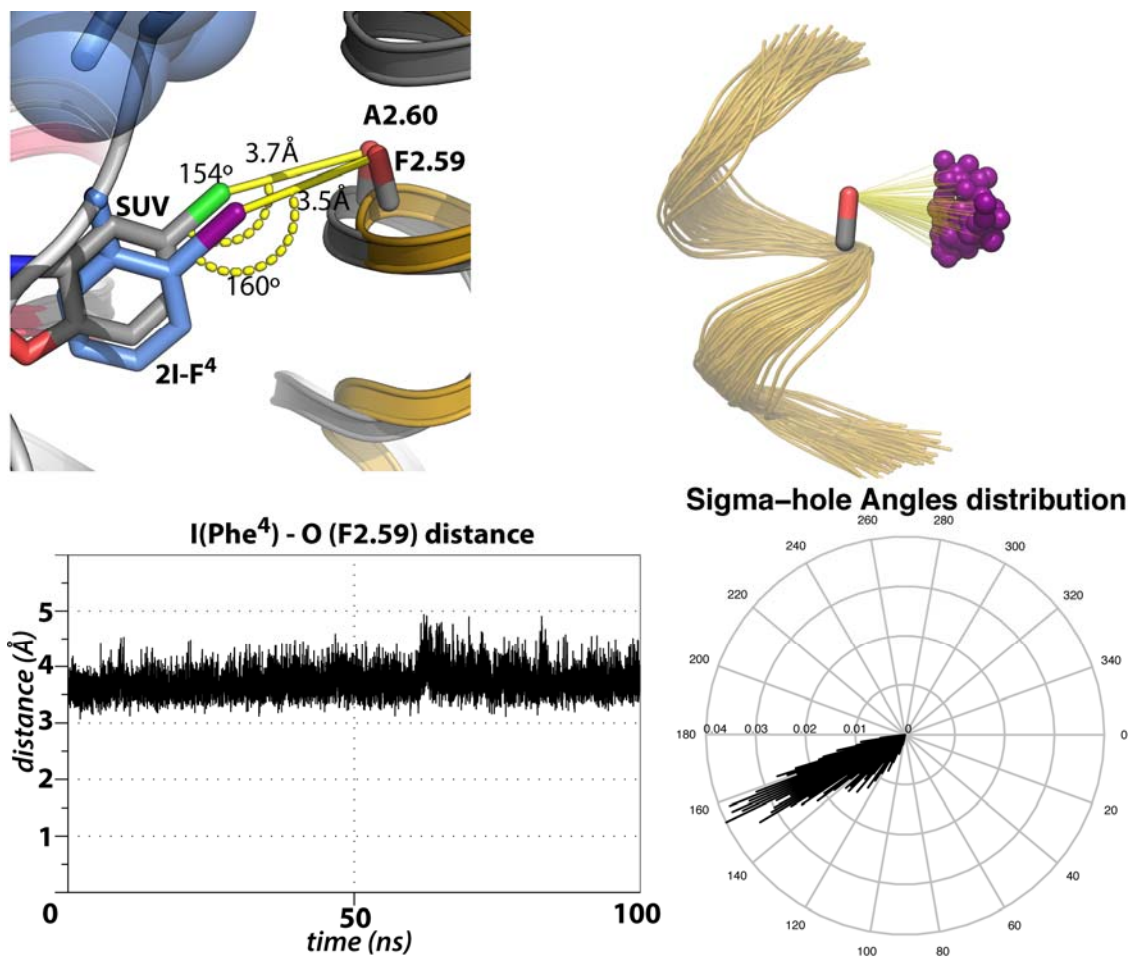

**Figure S4.** Detailed view of the crystal structure of OX<sub>2</sub> orexin receptor (grey cartoon) in complex with the chlorinated compound Suvorexant (SUV, in grey sticks) superposed to the homology model of  $\delta$ 1b-opioid receptor in complex with [2-I-Phe<sup>4</sup>]-LeuENK (upper left). Clearly, the observed halogen bond in the OX<sub>2</sub> crystal structure resembles the proposed halogen bond between [2-I-Phe<sup>4</sup>]-LeuENK and  $\delta$ 1b. Evolution of i) the interaction between the Iodine atom (spheres) and the carbonyl oxygen of residue Phe2.59 (upper right) (the C=O bond superposed the different snapshots), ii) the distance (Angströms) between the Iodine atom and the carbonyl oxygen of residue Phe2.59 (bottom left) and iii) distribution of the “sigma-hole” angle (C-X...O=C) (bottom right) along the 100ns MD trajectory. These values are in agreement with bibliographic data (9).

(9) Wilcken, R.; Zimmermann, M. O.; Lange, A.; Joerger, A. C.; Boeckler, F. M. Principles and Applications of Halogen Bonding in Medicinal Chemistry and Chemical Biology. *J. Med. Chem.* **2013**, *56*, 1363–1388.

## NMR studies

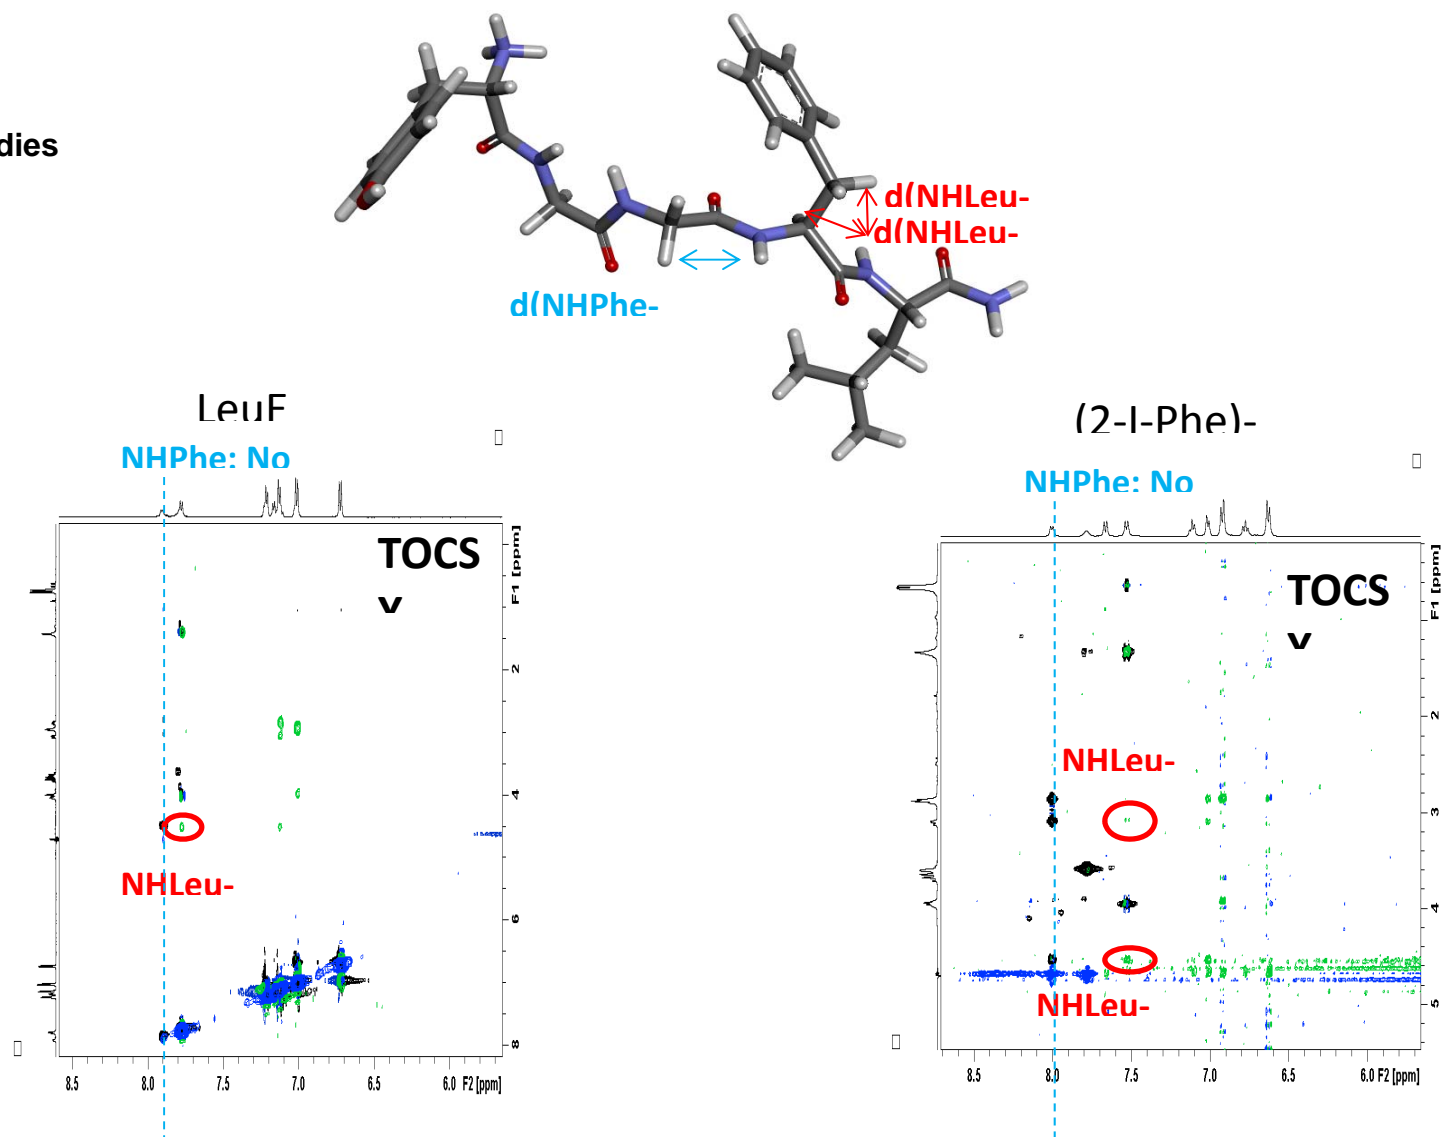

**Figure S4.** Sections of the superimposition of the NOESY/TOCSY spectra recorded LeuENK and its 2-I-Phe analogue. The NOE patterns are very similar and do not show any long range connectivity. This evidence strongly suggests the presence of major extended and flexible conformations in solution. One possible solution is shown on the top part of the figure.

## Biological studies

### EXPERIMENTAL SECTION

*Drugs and radioligands.* Naloxone (Nx) was purchased from Sigma-Aldrich (Madrid, Spain) and [<sup>3</sup>H]-diprenorphine (DPN) (50 Ci/mmol) from Perkin-Elmer (Boston MA). All other reagents used were from analytical grade.

*Cell culture and membrane preparation.* Stably transfected HEK293 cells expressing the  $\mu$  receptor (*dre-oprm1*, ENSEMBL gene ID ENSDARG0000039434), the  $\delta_{1a}$  receptor (*dre-oprd1a*, ENSEMBL gene ID ENSDARG0000041660) or the  $\delta_{1b}$  receptor (*dre-oprd1b*, ENSEMBL gene ID ENSDARG0000037159) from zebrafish were maintained in Dulbecco's modified Eagle's medium supplemented with 10% (v/v) fetal calf serum, 2 mM glutamine, 100 U mL<sup>-1</sup> penicillin, 0.1 mg mL<sup>-1</sup> streptomycin and 250  $\mu$ g mL<sup>-1</sup> Geneticin (G-418) (all from Gibco-BRL Life Technology Inc., Grand Island, NY, USA), at 37 °C in humidified atmosphere containing 5% (v/v) CO<sub>2</sub> in a Forma incubator.

Cells were grown to 80% confluence, harvested in phosphate buffered saline (PBS) pH 7.4 containing 2 mM EDTA and collected by centrifugation at 500 g. The cell pellets were frozen at -80 °C and resuspended in 50 mM Tris HCl buffer pH 7.4 (assay buffer) with protease inhibitors (0.1 mg mL<sup>-1</sup> bacitracin, 3.3  $\mu$ M captopril and protease inhibitor cocktail, from Sigma-Aldrich). Cell suspensions were homogenized with a Potter-Elvehjem tissue grinder in assay buffer and the homogenates were centrifuged at 500 g for 10 min at 4 °C. The nuclear pellet was homogenized again, centrifuged and discarded. The two supernatants were combined, homogenized again with the tissue grinder and the membrane pellet was collected upon centrifugation at 18000 g for 30 min at 4 °C. The crude membrane fraction was resuspended in ice-cold assay buffer with protease inhibitors and protein concentration was determined by Bradford (BioRad Laboratories, Alcobendas, Madrid, Spain).

*Competition binding assays and data analysis.* Radioligand binding was performed as previously described.<sup>1</sup> 10  $\mu$ g protein were incubated with different concentrations of unlabelled ligand ranging from 0.3 nM to 10  $\mu$ M, and using [<sup>3</sup>H]-DPN as radioligand (the working concentration was similar to the affinity constant,  $K_D = 1$  nM for *dre- $\mu$*  and 3.4 nM for both  $\delta$  receptors). Reactions were incubated for 1 h (for *dre- $\mu$*  and *dre- $\delta_{1a}$* ) or for 4 h (for *dre- $\delta_{1b}$* ) at 25 °C in a final volume of 250  $\mu$ L assay buffer. 10  $\mu$ M Nx was used to determine nonspecific binding. After incubation, the reaction was stopped by adding 4 mL of ice-cold 50 mM Tris HCl buffer pH 7.4, the mixture was rapidly filtrated using a Brandel Cell Harvester and washed two times onto GF/B glass-fiber filters that were presoaked with 0.2% (v/v) polyethylenimine for at least 1 h. The filters were placed in scintillation vials and incubated overnight at room temperature in EcoScint A scintillation liquid (London, England). Radioactivity was counted using a Beckman Coulter 6500 scintillation counter (Pasadena, CA). All experiments were performed in triplicate and repeated three times.

Specific Binding was defined as the difference between total binding and non-specific binding, as measured in presence of 10  $\mu$ M Nx. Radioligand binding data

were analyzed by computer-assisted non linear regression analysis using GraphPad Prism software (San Diego, CA, USA), and inhibition constants ( $K_i$ ) were obtained for each ligand using Cheng and Prusoff's equation, which corrects for the concentration of radioligand used in each experiment as well as for the affinity of the radioligand for its binding site ( $K_D$ ).<sup>2</sup>

(1) Gonzalez-Nunez, V.; Jiménez-Gonzalez, A.; Barreto-Valer, K.; Rodriguez, R. E. In vivo regulation of the mu opioid receptor: role of the endogenous opioid agents. *Mol. Med*, 2013, 19, 7-17.

(2) Cheng, Y.; Prusoff, W. H. Relationship between the inhibition constant ( $K_i$ ) and the concentration of inhibitor which causes 50 per cent inhibition ( $I_{50}$ ) of an enzymatic reaction. *Biochem. Pharmacol.* 1973, 22, 3099-3108.

**Figure S5:** Diprenorphine displacement curves.

**Competition binding assays** of the different series of halogenated peptides on  $\mu$  and  $\delta$  opioid receptor membrane homogenates. Data were fit to the one-site competition model and each point represents the mean  $\pm$  S.E.M. (capped bars) of three independent experiments performed in triplicate. Legends: parent compound (not halogenated): black; F: red; Cl: blue; Br: green; I: purple.

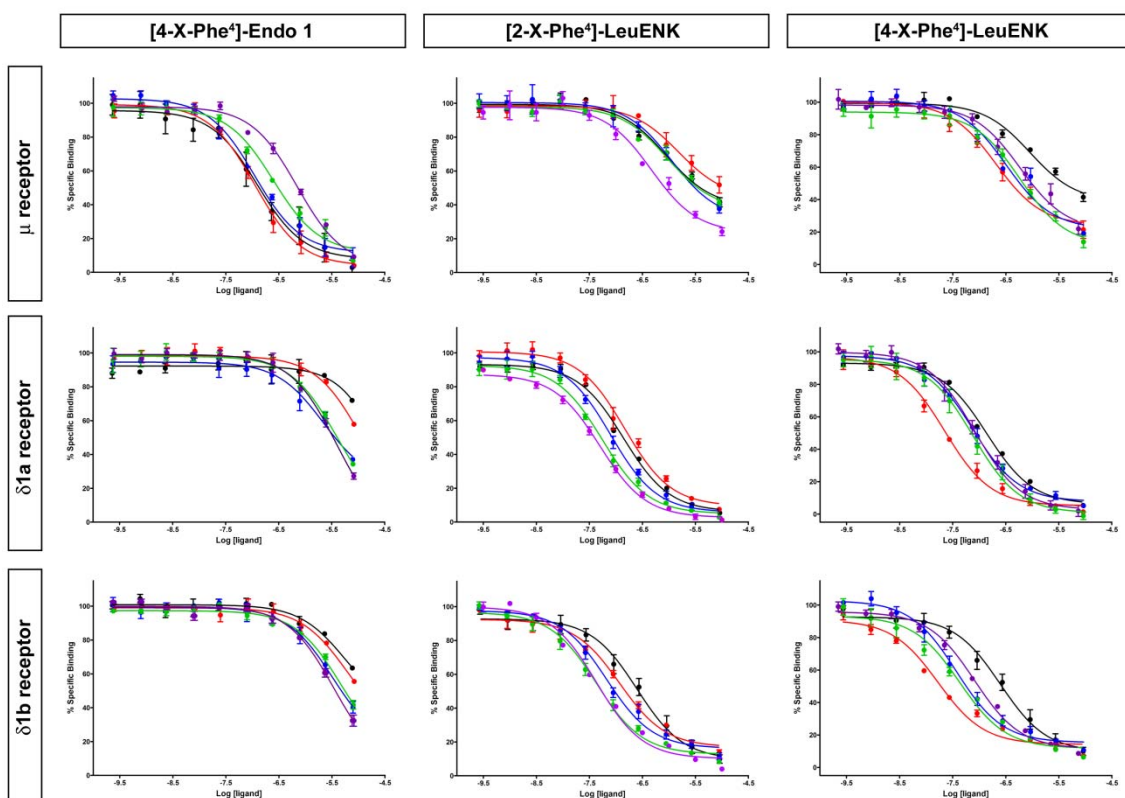

**Figure S6:** Ki-values obtained for each halogenated series of Endo1 and Leu-ENK when tested on the  $\mu$  and  $\delta$  receptors.

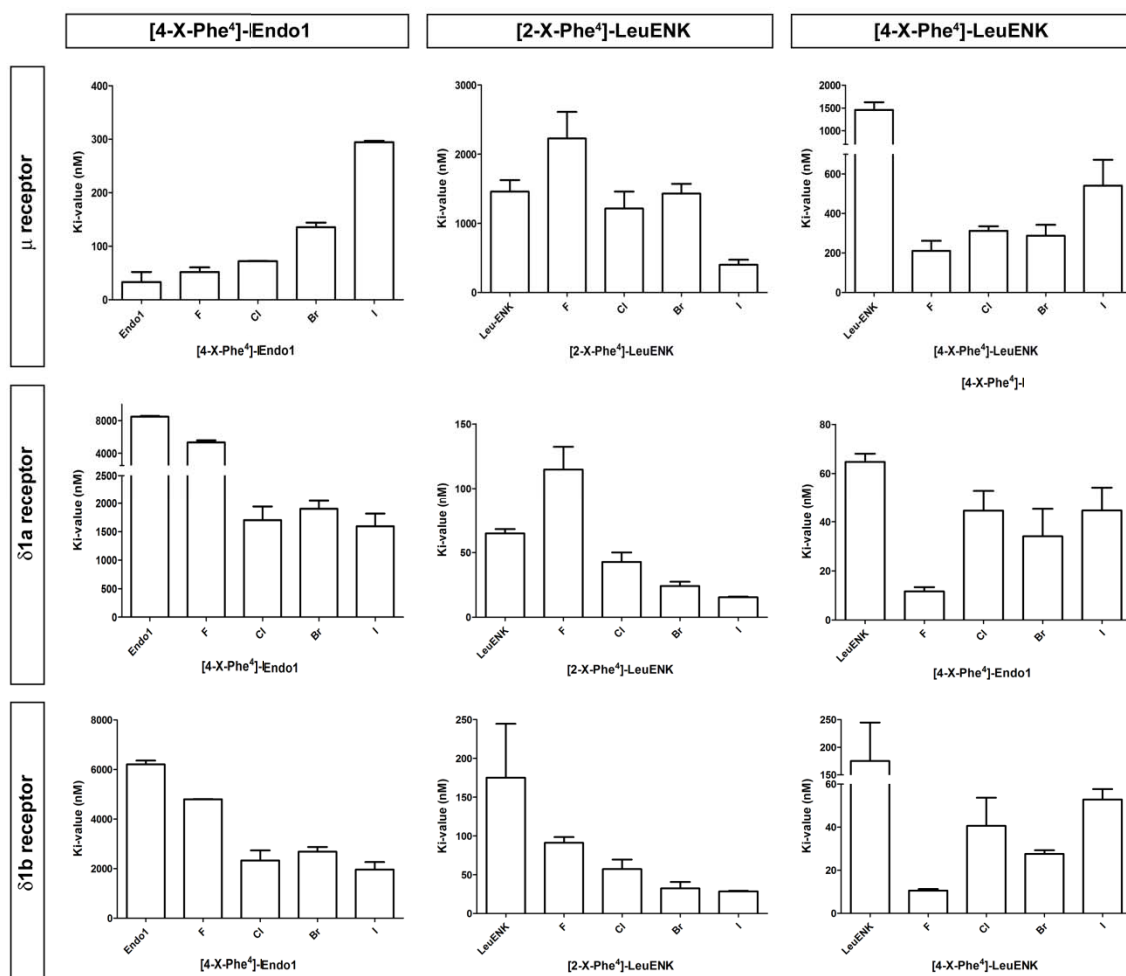

### General procedure for Solid Phase Peptide Synthesis (SPPS).

Amino acids, building blocks (Scheme 4), coupling reagents and Wang resins were purchased from Novabiochem AG. All reagents used for synthesis were from Anal. grade. Peptides were synthesized manually following standard solid-phase methods and Fmoc protocols on Wang resin using amino acids with orthogonal protections on lateral chains. Amide couplings were performed manually in a peptide synthesis column using DIC/HOBt in DMF under reciprocal oscillating agitation. Coupling efficiencies were monitored by Kaiser ninhydrin test. Fmoc groups were removed with a 20% piperidine in DMF solution. Peptides were cleaved from the resin by shaking with a cleavage cocktail consisting of TFA:H<sub>2</sub>O:TIS (95:2.5:2.5) for 2 h. The filtrate was evaporated, washed several times with cold <sup>t</sup>butyl methyl ether and concentrated under reduced pressure. Crude peptides were purified by C-18 RP-LC (VersaFlash™ Flash Chromatography System) using a water-acetonitrile gradient. Analytical RP-HPLC were performed using the following solvents A (0.1% TFA in H<sub>2</sub>O) and B (0.1% TFA in acetonitrile) and the Nucleosil 100 RP-18 (5μm) C18 column (4x 250 mm).

#### FmocPhe BUILDING BLOCKS

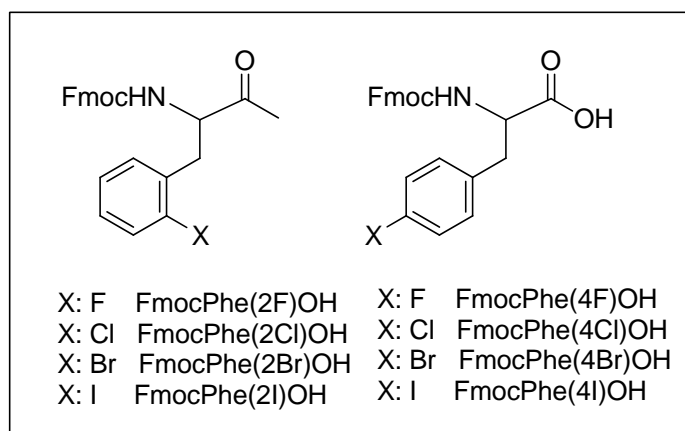

**Scheme 4:** Commercially available halogenated Phe building blocks used in SPPS (X: F, Cl, Br, and I).



## Synthesis and characterization of peptides

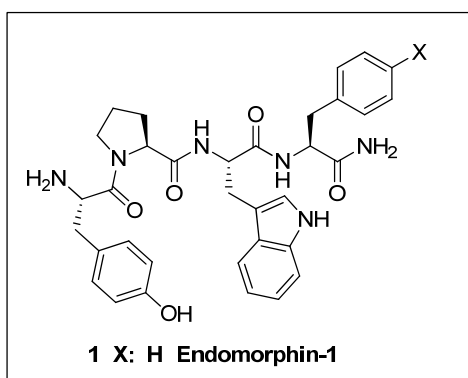

- 2 X: F [4-F-Phe<sup>4</sup>]-Endo-1  
 3 X: Cl [4-Cl-Phe<sup>4</sup>]-Endo-1  
 4 X: Br [4-Br-Phe<sup>4</sup>]-Endo-1  
 5 X: I [4-I-Phe<sup>4</sup>]-Endo-1

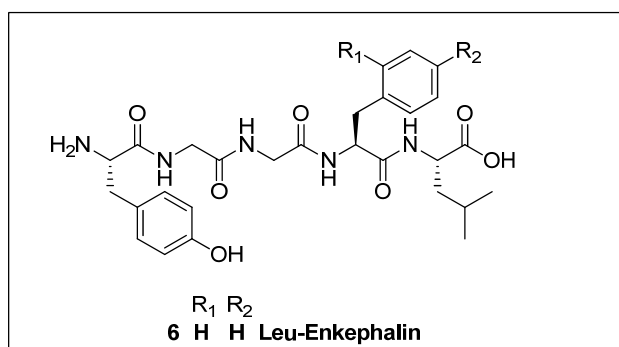

### [2-X-Phe<sup>4</sup>]-Leu-ENK

R<sub>1</sub> R<sub>2</sub>

- 7 F H [2-F-Phe<sup>4</sup>]-Leu-ENK  
 8 Cl H [2-Cl-Phe<sup>4</sup>]-Leu-ENK  
 9 Br H [2-Br-Phe<sup>4</sup>]-Leu-ENK  
 10 I H [2-I-Phe<sup>4</sup>]-Leu-ENK

### [4-X-Phe<sup>4</sup>]-Leu-ENK

R<sub>1</sub> R<sub>2</sub>

- 11 H F [4-F-Phe<sup>4</sup>]-Leu-ENK  
 12 H Cl [4-Cl-Phe<sup>4</sup>]-Leu-ENK  
 13 H Br [4-Br-Phe<sup>4</sup>]-Leu-ENK  
 14 H I [4-I-Phe<sup>4</sup>]-Leu-ENK

## Synthesis and characterization of endomorphin-1 (1)

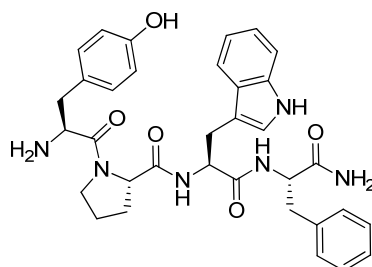

Peptide 1 (H-Tyr-Pro-Trp-Phe-NH<sub>2</sub>) was synthesized from 100 mg (0,067 mmol) of Fmoc-Rink Amide resin (substitution: 0,61 mmol/g resin) using following protected peptides: Fmoc-Phe-OH, Fmoc-Trp(Boc)-OH, Fmoc-Pro-OH and Fmoc-Tyr(OtBu)-OH (4 h). Crude was purified by Prep. RP-HPLC with *Versaflash*<sup>TM</sup> (From (20:80) (ACN:H<sub>2</sub>O) to (100:0) (ACN:H<sub>2</sub>O) in 50 min with a RP-C<sub>18</sub> cartridge) to obtain 36 mg of endomorphin-1. Characterization: Anal. RP-HPLC (20-80% B in 25 min, r.t.: 12,86 min). UPLC-HRMS (ESI/TOF): 611,2974 ([M+H]<sup>+</sup>, C<sub>34</sub>H<sub>39</sub>N<sub>6</sub>O<sub>5</sub><sup>+</sup>; calc. 611,2982). Peptidic content 76,5% (Elemental analysis 10,5% N; C<sub>34</sub>H<sub>38</sub>N<sub>6</sub>O<sub>5</sub> calc. 11,6% N).

### [4-F-Phe<sup>4</sup>]-endomorphin-1 (2)

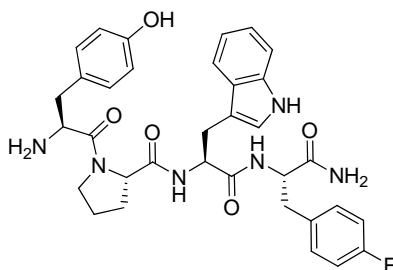

Peptide **2** (H-Tyr-Pro-Trp-(4-F)Phe-NH<sub>2</sub>) was synthesized from 200 mg (0,122 mmol) of Fmoc-Rink Amide resin (substitution: 0,61 mmol/g resin) using following protected peptides: Fmoc-(4-F)Phe-OH (2 eq., 20 h), Fmoc-Trp(N-Boc)-OH, Fmoc-Pro-OH and Fmoc-Tyr(tBu)-OH (4 h). Crude was purified by Prep. RP-HPLC with *Versaflash*<sup>TM</sup> (From (20:80) (ACN:H<sub>2</sub>O) to (100:0) (ACN:H<sub>2</sub>O) in 50 min with a RP-C<sub>18</sub> cartridge) to obtain 56 mg of [4-F-Phe<sup>4</sup>]-endomorphin-1, as an orange solid. Characterization: Anal. RP-HPLC (20-80% B in 25 min, r.t.: 12,61 min). UPLC-HRMS(ESI/TOF): 629,2869 ([M+H]<sup>+</sup>, C<sub>34</sub>H<sub>38</sub>N<sub>6</sub>O<sub>5</sub>F<sup>+</sup>; calc. 629,2888). Peptidic content 83.0% (Elemental analysis 11,1% N; C<sub>34</sub>H<sub>37</sub>N<sub>6</sub>O<sub>5</sub>F calc. 13,3% N).

### [4-Cl-Phe<sup>4</sup>]-endomorphin-1 (3)

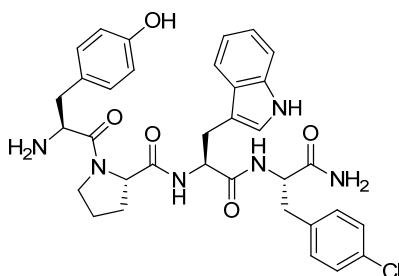

Peptide **3** (H-Tyr-Pro-Trp-(4-Cl)Phe-NH<sub>2</sub>) was synthesized from 300 mg (0,183 mmol) of Fmoc-Rink Amide resin (substitution: 0,61 mmol/g resin) using following protected peptides: Fmoc-(4-Cl)Phe-OH (2 eq., 20 h), Fmoc-Trp(N-Boc)-OH, Fmoc-Pro-OH and Fmoc-Tyr(tBu)-OH (4 h). Crude was purified by Prep. RP-HPLC with *Versaflash*<sup>TM</sup> (From (20:80) (ACN:H<sub>2</sub>O) to (100:0) (ACN:H<sub>2</sub>O) in 50 min with a RP-C<sub>18</sub> cartridge) to obtain 39 mg of [4-Cl-Phe<sup>4</sup>]-endomorphin-1, as a yellow solid. Characterization: Anal. RP-HPLC (20-80% B in 25 min, r.t.: 14,51 min). UPLC-HRMS(ESI/TOF): 645,2601 ([M+H]<sup>+</sup>, C<sub>34</sub>H<sub>38</sub>N<sub>6</sub>O<sub>5</sub>Cl<sup>+</sup>; calc. 645,2592). Peptidic content 92.4% (Elemental analysis 11,0% N; C<sub>34</sub>H<sub>37</sub>N<sub>6</sub>O<sub>5</sub>Cl calc. 11,9% N).

#### [4-Br-Phe<sup>4</sup>]endomorphin-1 (4)

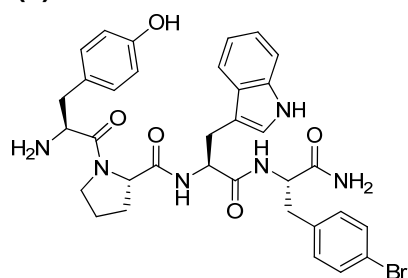

Peptide **4** (H-Tyr-Pro-Trp-(4-Br)Phe-NH<sub>2</sub>) was synthesized from 200 mg (0,122 mmol) of Fmoc-Rink Amide resin (substitution: 0,61 mmol/g resin) using following protected peptides: Fmoc-(4-Br)Phe-OH (2 eq., 20 h), Fmoc-Trp(N-Boc)-OH, Fmoc-Pro-OH and Fmoc-Tyr(tBu)-OH (20 h). Crude was purified by Prep. RP-HPLC with *Versaflash*<sup>TM</sup> (From (20:80) (ACN:H<sub>2</sub>O) to (100:0) (ACN:H<sub>2</sub>O) in 50 min with a RP-C<sub>18</sub> cartridge) to obtain 84 mg of [4-Br-Phe<sup>4</sup>]-endomorphin-1 as an orange solid. Characterization: Anal. RP-HPLC (20-80% B in 25 min, r.t.: 13,97 min). UPLC-HRMS(ESI/TOF): 689,2084 ([M+H]<sup>+</sup>, C<sub>34</sub>H<sub>38</sub>N<sub>6</sub>O<sub>5</sub><sup>79</sup>Br<sup>+</sup>; calc. 689,2087), 691,2067 ([M+H]<sup>+</sup>, C<sub>34</sub>H<sub>38</sub>N<sub>6</sub>O<sub>5</sub><sup>81</sup>Br<sup>+</sup>; calc. 691,2067). Peptidic content 79,6% (Elemental analysis 9,7% N; C<sub>34</sub>H<sub>37</sub>N<sub>6</sub>O<sub>5</sub>Br calc. 12,2% N).

#### [4-I-Phe<sup>4</sup>]endomorphin-1 (5)

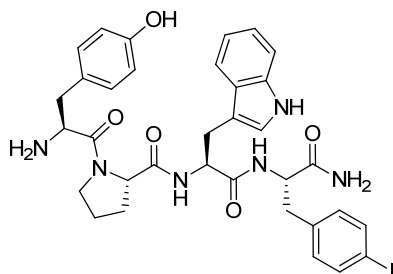

Peptide **5** (H-Tyr-Pro-Trp-(4-I)Phe-NH<sub>2</sub>) was synthesized from 200 mg (0,122 mmol) of Fmoc-Rink Amide resin (substitution: 0,61 mmol/g resin) using following protected peptides: Fmoc-(4-I)Phe-OH (2 eq., 20 h), Fmoc-Trp(Boc)-OH, Fmoc-Pro-OH and Fmoc-Tyr(tBu)-OH (20 h). Crude was purified by Prep. RP-HPLC with *Versaflash*<sup>TM</sup> (From (20:80) (ACN:H<sub>2</sub>O) to (100:0) (ACN:H<sub>2</sub>O) in 50 min with a RP-C<sub>18</sub> cartridge) to obtain 47 mg of [4-I-Phe<sup>4</sup>]-endomorphin-1 as a yellow solid. Characterization: Anal. RP-HPLC (20-80% B in 25 min, r.t.: 14,62 min). UPLC-HRMS(ESI/TOF): 737,1962 ([M+H]<sup>+</sup>, C<sub>34</sub>H<sub>38</sub>N<sub>6</sub>O<sub>5</sub>I<sup>+</sup>; calc. 737,1948). Peptidic content 82,4% (Elemental analysis 9,4% N; C<sub>34</sub>H<sub>37</sub>N<sub>6</sub>O<sub>5</sub>I calc. 11,4% N).

### Leu-enkephalin (Leu-ENK) (6)

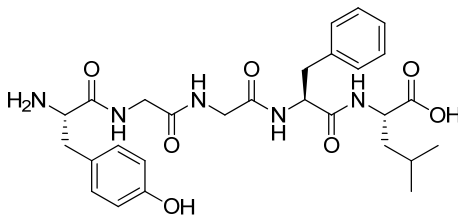

Leu-ENK (6) (H-Tyr-Gly-Gly-Phe-Leu-OH) was synthesized from 120 mg (0,067 mmol) of Fmoc-Leu-Wang resin (substitution: 0,61 mmol/g resin) using following protected peptides: Fmoc-Phe-OH, Fmoc-Gly-OH, Fmoc-Gly-OH and Fmoc-Tyr(tBu)-OH. Crude was purified by Prep. RP-HPLC with *Versaflash*<sup>TM</sup> (From (5:95) (ACN:H<sub>2</sub>O) to (50:50) (ACN:H<sub>2</sub>O) in 50 min with a RP-C<sub>18</sub> cartridge) to obtain 30 mg of Leu-ENK as a white solid. Characterization: Anal. RP-HPLC (20-80% B in 25 min, r.t.: 11,3 min). UPLC-HRMS (ESI/TOF): 590,2385 ([M+H]<sup>+</sup>, C<sub>28</sub>H<sub>38</sub>N<sub>5</sub>O<sub>7</sub><sup>+</sup>; calc. 555,2693). Peptidic content 76,1% (Elemental analysis 9,3% N; C<sub>28</sub>H<sub>37</sub>N<sub>5</sub>O<sub>7</sub> calc. 12,2% N).

### [2-F-Phe<sup>4</sup>]-Leu-ENK (7)

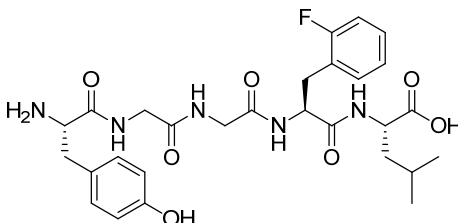

Peptide 7 (H-Tyr-Gly-Gly-(2-F)Phe-Leu-OH) was synthesized from 120 mg (0.087 mmol) of Fmoc-Leu-Wang resin (substitution: 0,61 mmol/g resin) using following protected peptides: Fmoc-(2-F)Phe-OH (2eq., 20 h), Fmoc-Gly-OH, Fmoc-Gly-OH and Fmoc-Tyr(tBu)-OH (5 h). Crude was purified by Prep. RP-HPLC with *Versaflash*<sup>TM</sup> (From (5:95) (ACN:H<sub>2</sub>O) to (50:50) (ACN:H<sub>2</sub>O) in 50 min with a RP-C<sub>18</sub> cartridge) to obtain 34 mg of [2-F-Phe<sup>4</sup>]-Leu-ENK as a white solid. Characterization: Anal. RP-HPLC (20-80% B in 25 min, r.t.: 9,7 min). UPLC-HRMS(ESI/TOF): 574,2670 ([M+H]<sup>+</sup>, C<sub>28</sub>H<sub>37</sub>N<sub>5</sub>O<sub>7</sub>F<sup>+</sup>; calc. 574,2677). Peptidic content 89,0% (Elemental analysis 11,2% N; C<sub>28</sub>H<sub>36</sub>N<sub>5</sub>O<sub>7</sub>F calc. 12,6% N).

### [2-Cl-Phe<sup>4</sup>]-Leu-ENK (8)

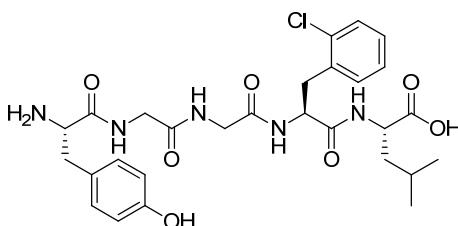

Peptide **8** (H-Tyr-Gly-Gly-(2-Cl)Phe-Leu-OH) was synthesized from 120 mg (0.087 mmol) of Fmoc-Leu-Wang resin (substitution: 0,61 mmol/g resin) using following protected peptides: Fmoc-(2-Cl)Phe-OH (2eq., 20 h), Fmoc-Gly-OH, Fmoc-Gly-OH and Fmoc-Tyr(tBu)-OH (5 h). Crude was purified by Prep. RP-HPLC with *Versaflash*<sup>TM</sup> (From (5:95) (ACN:H<sub>2</sub>O) to (50:50) (ACN:H<sub>2</sub>O) in 50 with a RP-C<sub>18</sub> cartridge) to obtain 30 mg of [2-Cl-Phe<sup>4</sup>]-Leu-ENK as a white solid. Characterization: Anal. RP-HPLC (20-80% B in 25 min, r.t.: 12,6 min). UPLC-HRMS (ESI/TOF): 590,2385 ([M+H]<sup>+</sup>, C<sub>28</sub>H<sub>37</sub>N<sub>5</sub>O<sub>7</sub>Cl<sup>+</sup>; calc. 590,2382). Peptidic content 91,6% (Elemental analysis 10,9% N; C<sub>28</sub>H<sub>36</sub>N<sub>5</sub>O<sub>7</sub>Cl calc. 11,9% N).

### [2-Br-Phe<sup>4</sup>]-Leu-ENK (9)

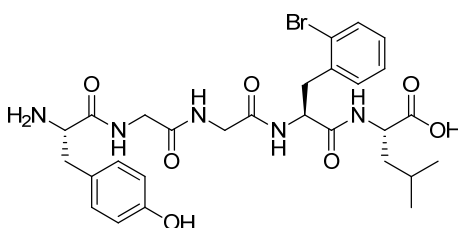

Peptide **9** (H-Tyr-Gly-Gly-(2-Br)Phe-Leu-OH) was synthesized from 120 mg (0.087 mmol) of Fmoc-Leu-Wang resin (substitution: 0,61 mmol/g resin) using following protected peptides: Fmoc-(2-Br)Phe-OH (2 eq., 20 h), Fmoc-Gly-OH, Fmoc-Gly-OH and Fmoc-Tyr(tBu)-OH (5 h). Crude was purified by Prep. RP-HPLC with *Versaflash*<sup>TM</sup> (From (5:95) (ACN:H<sub>2</sub>O) to (50:50) (ACN:H<sub>2</sub>O) in 50 min with a RP-C<sub>18</sub> cartridge) to obtain 10 mg of [2-Br-Phe<sup>4</sup>]-Leu-ENK as a white solid. Characterization: Anal. RP-HPLC (20-80% B in 25 min, r.t.: 11,9 min). UPLC-HRMS(ESI/TOF): 634,1891 ([M+H]<sup>+</sup>, C<sub>28</sub>H<sub>37</sub>N<sub>5</sub>O<sub>7</sub>Br<sup>+</sup>; calc. 634,1849). Peptidic content 88,4% (Elemental analysis 9,8% N; C<sub>28</sub>H<sub>36</sub>N<sub>5</sub>O<sub>7</sub>Br calc. 11,0% N).

### [2-I-Phe<sup>4</sup>]-Leu-ENK (10)

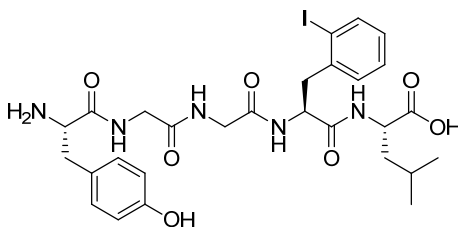

Peptide **10** (H-Tyr-Gly-Gly-(2-I)Phe-Leu-OH) was synthesized from 150 mg (0.096 mmol) of Fmoc-Leu-Wang resin (substitution: 0,64 mmol/g resin) using following protected peptides: Fmoc-(2-I)Phe-OH (2 eq., 20 h), Fmoc-Gly-OH, Fmoc-Gly-OH and Fmoc-Tyr(tBu)-OH. Crude was purified by Prep. RP-HPLC with *Versaflash*<sup>TM</sup> (From (5:95) (ACN:H<sub>2</sub>O) a (50:50) (ACN:H<sub>2</sub>O) in 50 min with a RP-C<sub>18</sub> cartridge) to obtain 42

mg of [2-I-Phe<sup>4</sup>]-Leu-ENK as a white solid. Characterization: Anal. RP-HPLC (20-80% B in 25 min, r.t.: 13,4 min). UPLC-HRMS (ESI/TOF): 682.1768 ([M+H]<sup>+</sup>, C<sub>28</sub>H<sub>37</sub>N<sub>5</sub>O<sub>7</sub>I<sup>+</sup>; calc. 682.1762). Peptidic content 89,3% (Elemental analysis 9,18% N; C<sub>28</sub>H<sub>36</sub>N<sub>5</sub>O<sub>7</sub>I calc. 10,3% N).

#### [4-F-Phe<sup>4</sup>]-Leu-ENK (11)

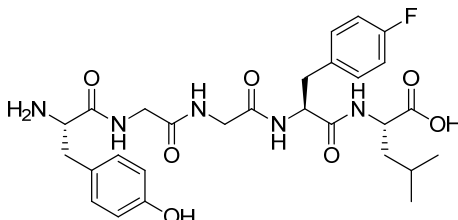

Peptide **11** [H-Tyr-Gly-Gly-(4-F)Phe-Leu-OH] was synthesized from 120 mg (0.087 mmol) of Fmoc-Leu-Wang resin (substitution: 0,61 mmol/g resin) using following protected peptides: Fmoc-(4-F)Phe-OH (2 eq., 20 h), Fmoc-Gly-OH, Fmoc-Gly-OH and Fmoc-Tyr(tBu)-OH (5 h). Crude was purified by Prep. RP-HPLC with *Versaflash*<sup>TM</sup> (From (5:95) (ACN:H<sub>2</sub>O) to (50:50) (ACN:H<sub>2</sub>O) in 50 min with a RP-C<sub>18</sub> cartridge) to obtain 29 mg of [4-F-Phe<sup>4</sup>]-Leu-ENK as a white solid. Characterization: Anal. RP-HPLC (20-80% B in 25 min, r.t.: 11,8 min). UPLC-HRMS (ESI/TOF): 574,2670 ([M+H]<sup>+</sup>, C<sub>28</sub>H<sub>37</sub>N<sub>5</sub>O<sub>7</sub>F<sup>+</sup>; calc. 574,2677). Peptidic content 91,3% (Elemental analysis 11,5% N; C<sub>28</sub>H<sub>36</sub>N<sub>5</sub>O<sub>7</sub>F calc. 12,6% N).

#### [4-Cl-Phe<sup>4</sup>]-Leu-ENK (12)

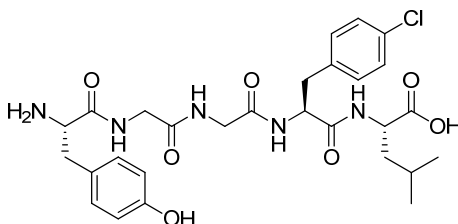

Peptide **12** [H-Tyr-Gly-Gly-(4-Cl)Phe-Leu-OH] was synthesized from 120 mg (0.087 mmol) of Fmoc-Leu-Wang resin (substitution: 0,61 mmol/g resin) using following protected peptides: Fmoc-(4-Cl)Phe-OH (2 eq., 20 h), Fmoc-Gly-OH, Fmoc-Gly-OH and Fmoc-Tyr(tBu)-OH (5 h). Crude was purified by Prep. RP-HPLC with *Versaflash*<sup>TM</sup> (From (5:95) (ACN:H<sub>2</sub>O) to (50:50) (ACN:H<sub>2</sub>O) in 50 min with a RP-C<sub>18</sub> cartridge) to obtain 37 mg of [4-Cl-Phe<sup>4</sup>]-Leu-ENK as a white solid. Characterization: Anal. RP-HPLC (20-80% Bin 25 min, r.t.: 12,6 min). UPLC-HRMS (ESI/TOF): 590,2376 ([M+H]<sup>+</sup>, C<sub>28</sub>H<sub>37</sub>N<sub>5</sub>O<sub>7</sub>Cl<sup>+</sup>; calc. 590,2382). Peptidic content 92,4% (Elemental analysis 11,0% N; C<sub>28</sub>H<sub>36</sub>N<sub>5</sub>O<sub>7</sub>Cl calc. 11,9% N).

### [4-Br-Phe<sup>4</sup>]-Leu-ENK (13)

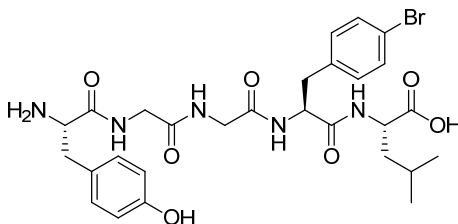

Peptide **13** [H-Tyr-Gly-Gly-(4-Br)Phe-Leu-OH] was synthesized from 120 mg (0.087 mmol) of Fmoc-Leu-Wang resin (substitution: 0,61 mmol/g resin) using following protected peptides: Fmoc-(4-Br)Phe-OH (2 eq., 20 h), Fmoc-Gly-OH, Fmoc-Gly-OH and Fmoc-Tyr(tBu)-OH (5 h). Crude was purified by Prep. RP-HPLC with *Versaflash*<sup>TM</sup> (From (5:95) (ACN:H<sub>2</sub>O) to (50:50) (ACN:H<sub>2</sub>O) in 50 min with a RP-C<sub>18</sub> cartridge) to obtain 40 mg of [4-Br-Phe<sup>4</sup>]-Leu-ENK as a white solid. Characterization: Anal. RP-HPLC (20-80% Bin 25 min, r.t.: 13,2 min). UPLC-HRMS (ESI/TOF): 634,1849 ([M+H]<sup>+</sup>, C<sub>28</sub>H<sub>37</sub>N<sub>5</sub>O<sub>7</sub>Br<sup>+</sup>; calc. 634,1849). Peptidic content 91,8% (Elemental analysis 10,1% N; C<sub>28</sub>H<sub>36</sub>N<sub>5</sub>O<sub>7</sub>Br calc. 11,0% N).

### [4-I-Phe<sup>4</sup>]-Leu-ENK (14)

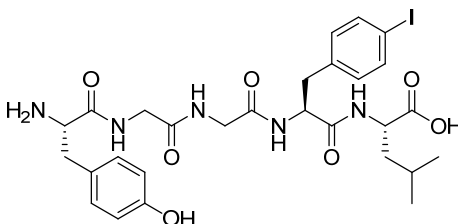

Peptide **14** [H-Tyr-Gly-Gly-(4-I)Phe-Leu-OH] was synthesized from 120 mg (0.087 mmol) of Fmoc-Leu-Wang resin (substitution: 0,61 mmol/g resin) using following protected peptides: Fmoc-(4-I)Phe-OH (2 eq., 20 h), Fmoc-Gly-OH, Fmoc-Gly-OH and Fmoc-Tyr(tBu)-OH (5 h). Crude was purified by Prep. RP-HPLC with *Versaflash*<sup>TM</sup> (From (5:95) (ACN:H<sub>2</sub>O) to (50:50) (ACN:H<sub>2</sub>O) in 50 min with RP-C<sub>18</sub> cartridge) to obtain 36 mg of [4-I-Phe<sup>4</sup>]-Leu-ENK as a white solid. Characterization: Anal. RP-HPLC (20-80% B in 25 min, r.t.: 14,4 min). UPLC-HRMS (ESI/TOF): 682.1762 ([M+H]<sup>+</sup>, C<sub>28</sub>H<sub>37</sub>N<sub>5</sub>O<sub>7</sub>I<sup>+</sup>; calc. 682.1762). Peptidic content 82,4% (Elemental analysis 9,4% N; C<sub>28</sub>H<sub>36</sub>N<sub>5</sub>O<sub>7</sub>I calc. 11,4% N).

## HRMS (UPLC-TOF/MS) OF PEPTIDES

HRMS spectra (UPLC-TOF/MS) were recorded on a Waters ACQUITY UPLC System with Waters LCT Premier™ XE Mass Spectrometer operating either in the positive ion electrospray mode or in negative electrospray mode. Water and acetonitrile were used as carrier solvents.

Table

| Peptide                                        | Name                             | FORMULA<br>([M+H] <sup>+</sup> )                                                                                                                                                           | m/z<br>Calc.<br>([M+H] <sup>+</sup> ) | m/z<br>FOUND<br>([M+H] <sup>+</sup> ) |
|------------------------------------------------|----------------------------------|--------------------------------------------------------------------------------------------------------------------------------------------------------------------------------------------|---------------------------------------|---------------------------------------|
| <b>Endomorphin-1 and halogenated analogues</b> |                                  |                                                                                                                                                                                            |                                       |                                       |
| 1                                              | Endomorphin-1                    | C <sub>34</sub> H <sub>39</sub> N <sub>6</sub> O <sub>5</sub> <sup>+</sup>                                                                                                                 | 611,2982                              | 611,2974                              |
| 2                                              | [4-F-Phe <sup>4</sup> ]-Endo-1   | C <sub>34</sub> H <sub>38</sub> N <sub>6</sub> O <sub>5</sub> F <sup>+</sup>                                                                                                               | 629,2911                              | 629,2888                              |
| 3                                              | [4-Cl-Phe <sup>4</sup> ]-Endo-1  | C <sub>34</sub> H <sub>38</sub> N <sub>6</sub> O <sub>5</sub> Cl <sup>+</sup>                                                                                                              | 645,2592                              | 645,2579                              |
| 4                                              | [4-Br-Phe <sup>4</sup> ]-Endo-1  | C <sub>34</sub> H <sub>38</sub> N <sub>6</sub> O <sub>5</sub> <sup>79</sup> Br <sup>+</sup><br>C <sub>34</sub> H <sub>38</sub> N <sub>6</sub> O <sub>5</sub> <sup>81</sup> Br <sup>+</sup> | 689,2087<br>691,2067                  | 689,2025<br>691,2043                  |
| 5                                              | [4-I-Phe <sup>4</sup> ]-Endo-1   | C <sub>34</sub> H <sub>38</sub> N <sub>6</sub> O <sub>5</sub> I <sup>+</sup>                                                                                                               | 737,1960                              | 737,1948                              |
| <b>Leu-ENK and halogenated analogues</b>       |                                  |                                                                                                                                                                                            |                                       |                                       |
| 6                                              | Leu-ENK                          | C <sub>28</sub> H <sub>38</sub> N <sub>5</sub> O <sub>7</sub> <sup>+</sup>                                                                                                                 | 556,2771                              | 556,2781                              |
| 7                                              | [2-F-Phe <sup>4</sup> ]-Leu-ENK  | C <sub>28</sub> H <sub>37</sub> N <sub>5</sub> O <sub>7</sub> F <sup>+</sup>                                                                                                               | 574,2677                              | 574,2646                              |
| 8                                              | [2-Cl-Phe <sup>4</sup> ]-Leu-ENK | C <sub>28</sub> H <sub>37</sub> N <sub>5</sub> O <sub>7</sub> Cl <sup>+</sup>                                                                                                              | 590,2350                              | 590,2382                              |
| 9                                              | [2-Br-Phe <sup>4</sup> ]-Leu-ENK | C <sub>28</sub> H <sub>37</sub> N <sub>5</sub> O <sub>7</sub> <sup>79</sup> Br <sup>+</sup><br>C <sub>28</sub> H <sub>37</sub> N <sub>5</sub> O <sub>7</sub> <sup>81</sup> Br <sup>+</sup> | 634,1876<br>636,1856                  | 634,1882<br>636,1902                  |
| 10                                             | [2-I-Phe <sup>4</sup> ]-Leu-ENK  | C <sub>28</sub> H <sub>37</sub> N <sub>5</sub> O <sub>7</sub> I <sup>+</sup>                                                                                                               | 682.1738                              | 682.1768                              |
| 11                                             | [4-F-Phe <sup>4</sup> ]-Leu-ENK  | C <sub>28</sub> H <sub>37</sub> N <sub>5</sub> O <sub>7</sub> F <sup>+</sup>                                                                                                               | 574,2677                              | 574,2687                              |
| 12                                             | [4-Cl-Phe <sup>4</sup> ]-Leu-ENK | C <sub>28</sub> H <sub>37</sub> N <sub>5</sub> O <sub>7</sub> Cl <sup>+</sup>                                                                                                              | 590,2382                              | 590,2376                              |
| 13                                             | [4-Br-Phe <sup>4</sup> ]-Leu-ENK | C <sub>28</sub> H <sub>37</sub> N <sub>5</sub> O <sub>7</sub> <sup>79</sup> Br <sup>+</sup><br>C <sub>28</sub> H <sub>37</sub> N <sub>5</sub> O <sub>7</sub> <sup>81</sup> Br <sup>+</sup> | 634,1876<br>636,1856                  | 634,1868<br>636,1847                  |
| 14                                             | [4-I-Phe <sup>4</sup> ]-Leu-ENK  | C <sub>28</sub> H <sub>37</sub> N <sub>5</sub> O <sub>7</sub> I <sup>+</sup>                                                                                                               | 682.1738                              | 682.1736                              |



### HRMS of endomorphin-1 (1)

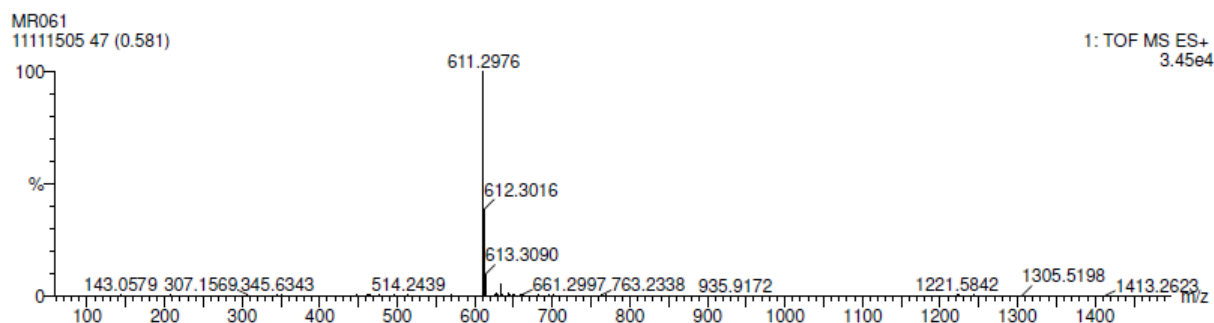

Minimum: -1.5  
Maximum: 10.0 10.0 50.0

| Mass     | Calc. Mass | mDa  | PPM  | DBE  | i-FIT | Formula       |
|----------|------------|------|------|------|-------|---------------|
| 611.2976 | 611.2982   | -0.6 | -1.0 | 18.5 | 20.2  | C34 H39 N6 O5 |

### HRMS of [4-F-Phe<sup>4</sup>]-ENDOMORPHIN-1 (2)

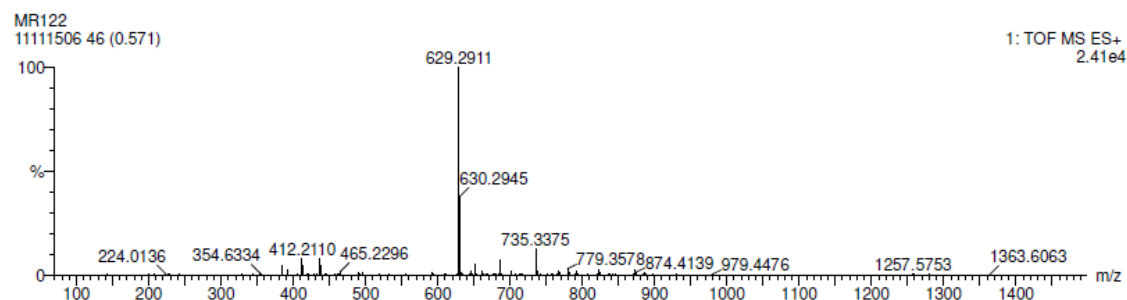

Minimum: -1.5  
Maximum: 10.0 10.0 50.0

| Mass     | Calc. Mass | mDa | PPM | DBE  | i-FIT | Formula         |
|----------|------------|-----|-----|------|-------|-----------------|
| 629.2911 | 629.2888   | 2.3 | 3.7 | 18.5 | 32.1  | C34 H38 N6 O5 F |

### HRMS of [4-Cl-Phe<sup>4</sup>]-endomorphin-1 (3)

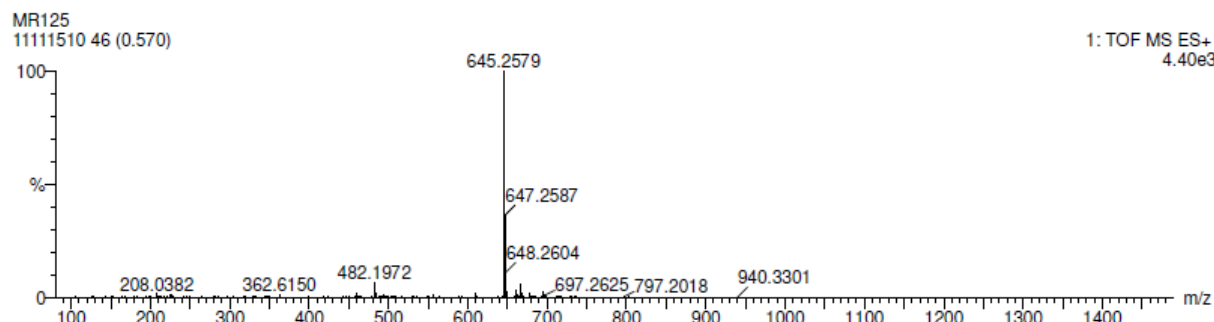

Minimum: -1.5  
Maximum: 10.0 20.0 50.0

| Mass     | Calc. Mass | mDa  | PPM  | DBE  | i-FIT | Formula          |
|----------|------------|------|------|------|-------|------------------|
| 645.2579 | 645.2592   | -1.3 | -2.0 | 18.5 | 20.5  | C34 H38 N6 O5 Cl |

### HRMS of [4-Br-Phe<sup>4</sup>]-endomorphin-1 (4)

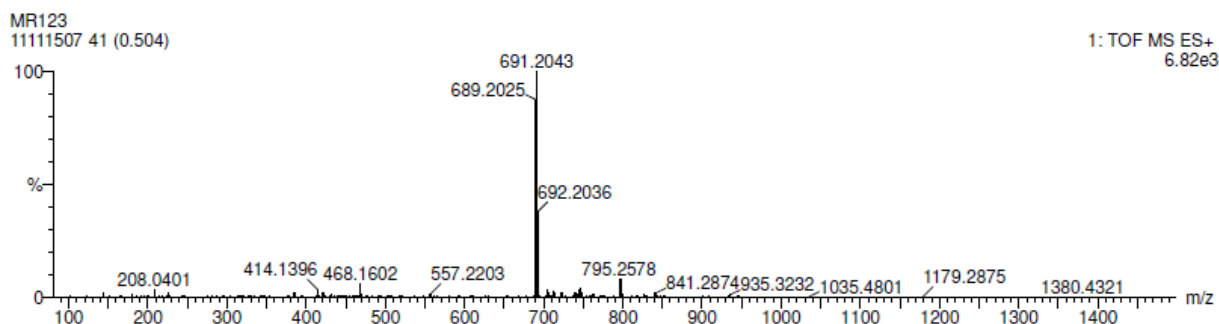

Minimum: 80.00  
Maximum: 100.00

| Mass     | RA     | Calc. Mass | mDa  | PPM  | DBE  | i-FIT | Formula            |
|----------|--------|------------|------|------|------|-------|--------------------|
| 689.2025 | 87.54  | 689.2087   | -6.2 | -9.0 | 18.5 | 16.2  | C34 H38 N6 O5 79Br |
| 691.2043 | 100.00 | 691.2067   | -2.4 | -3.5 | 18.5 | 4.8   | C34 H38 N6 O5 81Br |

### HRMS of [4-I-Phe<sup>4</sup>]-endomorphin-1 (5)

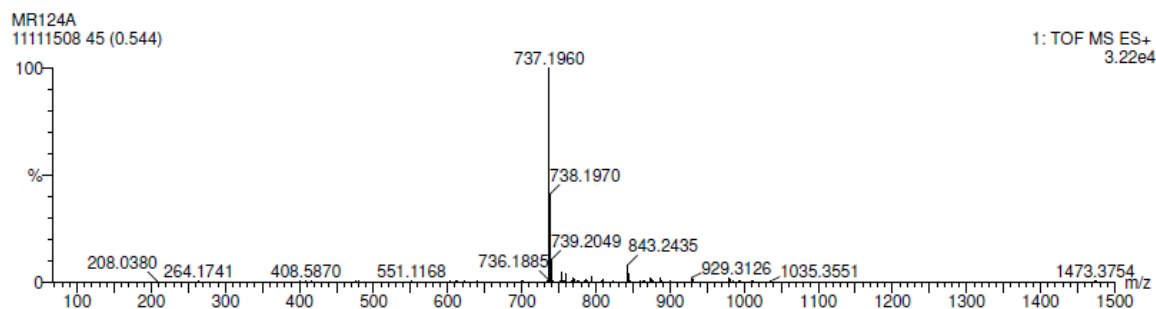

Minimum: -1.5  
Maximum: 10.0 20.0 50.0

| Mass     | Calc. Mass | mDa | PPM | DBE  | i-FIT | Formula         |
|----------|------------|-----|-----|------|-------|-----------------|
| 737.1960 | 737.1948   | 1.2 | 1.6 | 18.5 | 19.4  | C34 H38 N6 O5 I |

### HRMS of Leu-enkephalin (6)

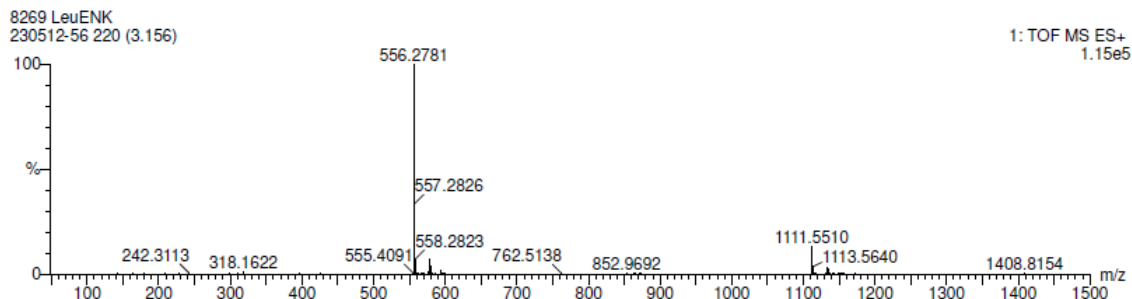

Minimum: -1.5  
Maximum: 10.0 30.0 50.0

| Mass     | Calc. Mass | mDa | PPM | DBE  | i-FIT | Formula       |
|----------|------------|-----|-----|------|-------|---------------|
| 556.2781 | 556.2771   | 1.0 | 1.8 | 12.5 | 8.4   | C28 H38 N5 O7 |

### HRMS of [2-F-Phe<sup>4</sup>]-Leu-ENK (7)

MR131  
11111515 46 (0.571)

1: TOF MS ES+  
1.13e4

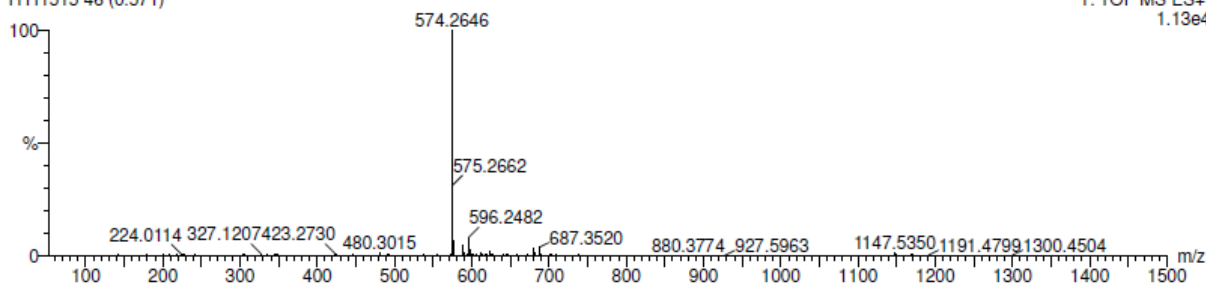

Minimum: -1.5  
Maximum: 10.0 20.0 50.0

| Mass     | Calc. Mass | mDa  | PPM  | DBE  | i-FIT | Formula         |
|----------|------------|------|------|------|-------|-----------------|
| 574.2646 | 574.2677   | -3.1 | -5.4 | 12.5 | 11.2  | C28 H37 N5 O7 F |

### HRMS of [2-Cl-Phe<sup>4</sup>]-Leu-ENK (8)

MR132  
11111516 48 (0.592)

1: TOF MS ES+  
7.07e3

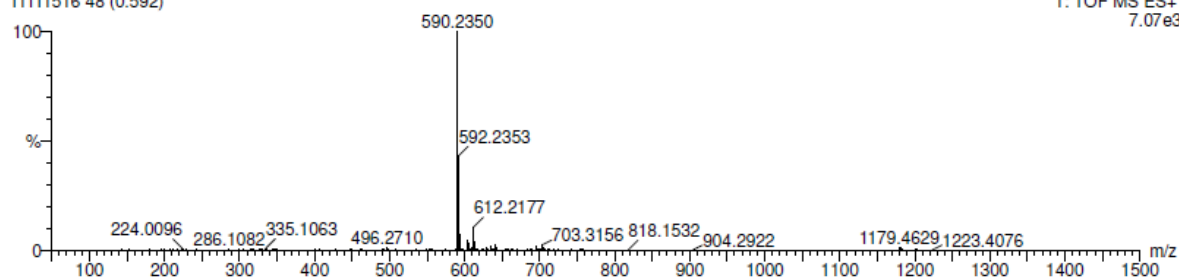

Minimum: -1.5  
Maximum: 10.0 20.0 50.0

| Mass     | Calc. Mass | mDa  | PPM  | DBE  | i-FIT | Formula          |
|----------|------------|------|------|------|-------|------------------|
| 590.2350 | 590.2382   | -3.2 | -5.4 | 12.5 | 23.4  | C28 H37 N5 O7 Cl |

### HRMS of [2-Br-Phe<sup>4</sup>]-Leu-ENK (9)

MR133  
11111517 45 (0.546)

1: TOF MS ES+  
2.38e3

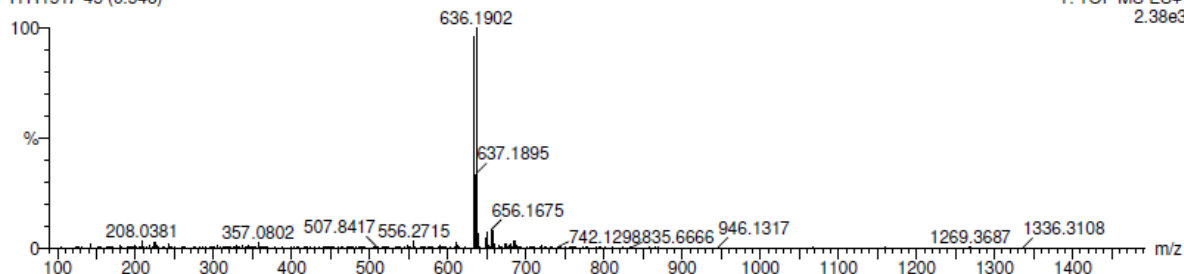

Minimum: 80.00  
Maximum: 100.00 10.0 20.0 50.0

| Mass     | RA     | Calc. Mass | mDa | PPM | DBE  | i-FIT | Formula            |
|----------|--------|------------|-----|-----|------|-------|--------------------|
| 634.1882 | 95.64  | 634.1876   | 0.6 | 0.9 | 12.5 | 0.4   | C28 H37 N5 O7 79Br |
| 636.1902 | 100.00 | 636.1856   | 4.6 | 7.2 | 12.5 | 1.0   | C28 H37 N5 O7 81Br |

### HRMS of [2-I-Phe<sup>4</sup>]-Leu-ENK (10)

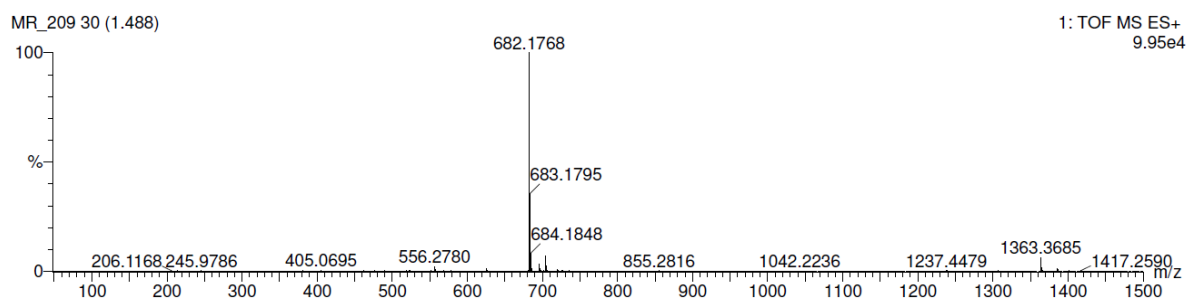

| Minimum: |            |      |      | -1.5 |       |                                                                 |
|----------|------------|------|------|------|-------|-----------------------------------------------------------------|
| Maximum: | 10.0       | 20.0 | 50.0 |      |       |                                                                 |
| Mass     | Calc. Mass | mDa  | PPM  | DBE  | i-FIT | Formula                                                         |
| 682.1768 | 682.1738   | 3.0  | 4.4  | 12.5 | 100.7 | C <sub>28</sub> H <sub>37</sub> N <sub>5</sub> O <sub>7</sub> I |

### HRMS of [4-F-Phe<sup>4</sup>]-Leu-ENK (11)

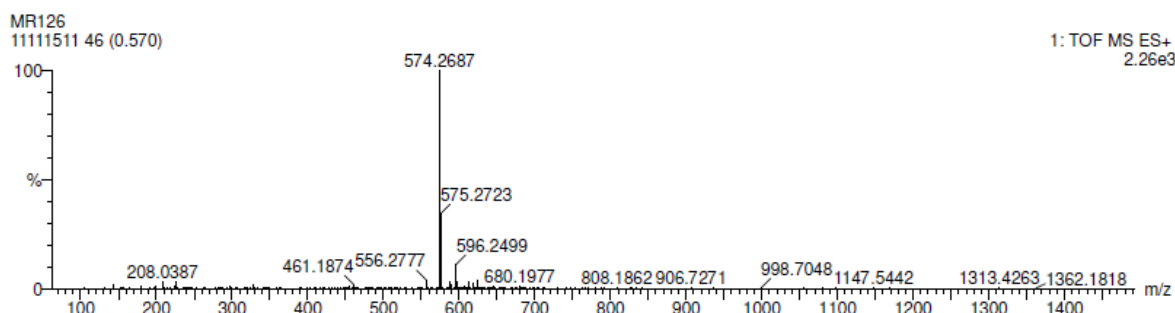

| Minimum: |            |      |      | -1.5 |       |                                                                 |
|----------|------------|------|------|------|-------|-----------------------------------------------------------------|
| Maximum: | 10.0       | 20.0 | 50.0 |      |       |                                                                 |
| Mass     | Calc. Mass | mDa  | PPM  | DBE  | i-FIT | Formula                                                         |
| 574.2687 | 574.2677   | 1.0  | 1.7  | 12.5 | 0.1   | C <sub>28</sub> H <sub>37</sub> N <sub>5</sub> O <sub>7</sub> F |

### HRMS of [4-Cl-Phe<sup>4</sup>]-Leu-ENK (12)

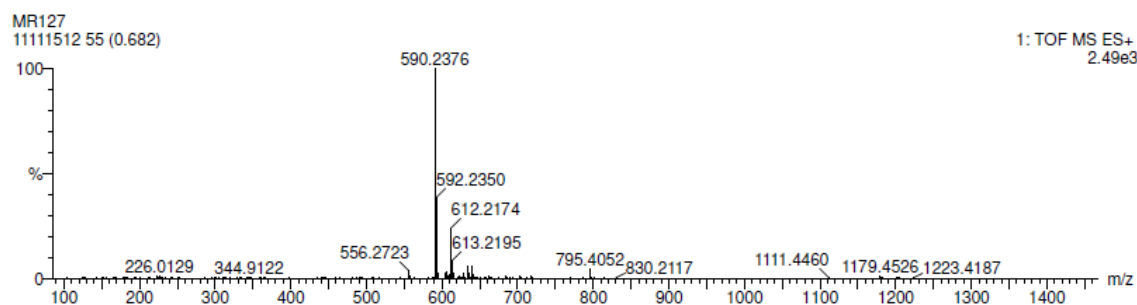

| Minimum: |            |      |      | -1.5 |       |                                                                  |
|----------|------------|------|------|------|-------|------------------------------------------------------------------|
| Maximum: | 10.0       | 20.0 | 50.0 |      |       |                                                                  |
| Mass     | Calc. Mass | mDa  | PPM  | DBE  | i-FIT | Formula                                                          |
| 590.2376 | 590.2382   | -0.6 | -1.0 | 12.5 | 0.7   | C <sub>28</sub> H <sub>37</sub> N <sub>5</sub> O <sub>7</sub> Cl |

### HRMS of [4-Br-Phe<sup>4</sup>]-Leu-ENK (13)

MR128A  
11111513 36 (0.434)

1: TOF MS ES+  
3.11e3

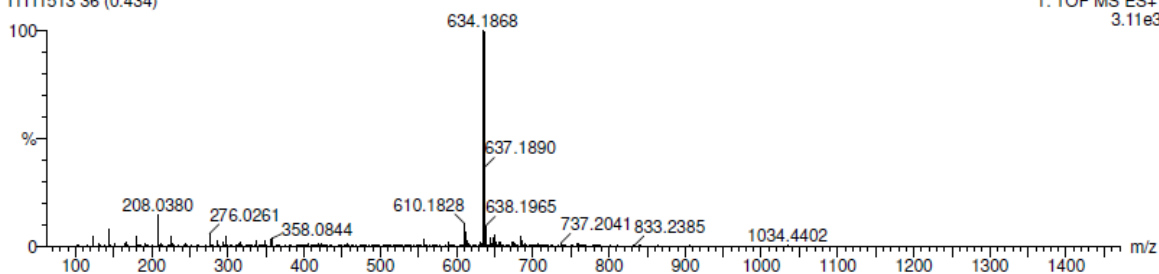

Minimum: 80.00  
Maximum: 100.00

| Mass     | RA     | Calc. Mass | mDa  | PPM  | DBE  | i-FIT | Formula                                                            |
|----------|--------|------------|------|------|------|-------|--------------------------------------------------------------------|
| 634.1868 | 100.00 | 634.1876   | -0.8 | -1.3 | 12.5 | 8.8   | C <sub>28</sub> H <sub>37</sub> N <sub>5</sub> O <sub>7</sub> 79Br |
| 636.1847 | 99.13  | 636.1856   | -0.9 | -1.4 | 12.5 | 16.9  | C <sub>28</sub> H <sub>37</sub> N <sub>5</sub> O <sub>7</sub> 81Br |

### HRMS of [4-I-Phe<sup>4</sup>]-Leu-ENK (14)

MR128B  
11111514 47 (0.581)

1: TOF MS ES+  
4.44e3

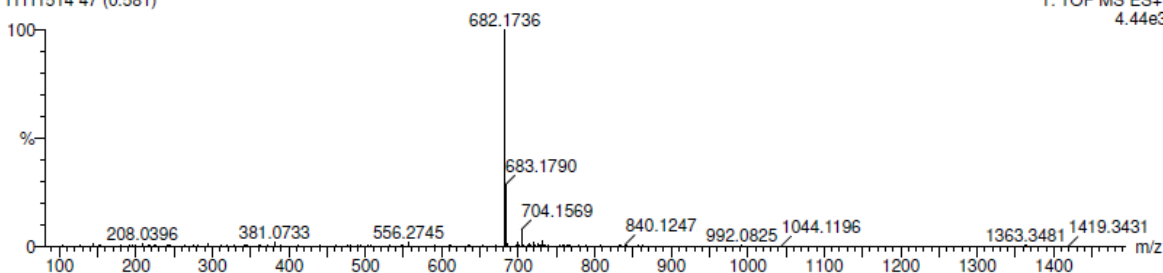

Minimum: -1.5  
Maximum: 10.0 20.0 50.0

| Mass     | Calc. Mass | mDa  | PPM  | DBE  | i-FIT | Formula                                                         |
|----------|------------|------|------|------|-------|-----------------------------------------------------------------|
| 682.1736 | 682.1738   | -0.2 | -0.3 | 12.5 | 122.6 | C <sub>28</sub> H <sub>37</sub> N <sub>5</sub> O <sub>7</sub> I |

## HPLC DATA FOR PEPTIDES SYNTHESIZED

HPLC solvents:

A: 0.1% TFA in H<sub>2</sub>O

B: 0.1% TFA in ACN

HPLC gradient:

From (80:20) (A:B) to (20:80) (A:B) in 25 min

| Peptide                              | Name                             | RETENTION TIME (min) |
|--------------------------------------|----------------------------------|----------------------|
| <b>ENDO-1 and ENDO-1 analogues</b>   |                                  |                      |
| 1                                    | Endomorphin-1                    | 12,86                |
| 2                                    | [4-F-Phe <sup>4</sup> ]-Endo-1   | 12,61                |
| 3                                    | [4-Cl-Phe <sup>4</sup> ]-Endo-1  | 14,51                |
| 4                                    | [4-Br-Phe <sup>4</sup> ]-Endo-1  | 13,97                |
| 5                                    | [4-I-Phe <sup>4</sup> ]-Endo-1   | 14,62                |
| <b>Leu-ENK and Leu-ENK analogues</b> |                                  |                      |
| 6                                    | Leu-ENK                          | 11,3                 |
| 7                                    | [2-F-Phe <sup>4</sup> ]-Leu-ENK  | 9,7                  |
| 8                                    | [2-Cl-Phe <sup>4</sup> ]-Leu-ENK | 12,6                 |
| 9                                    | [2-Br-Phe <sup>4</sup> ]-Leu-ENK | 11,9                 |
| 10                                   | [2-I-Phe <sup>4</sup> ]-Leu-ENK  | 13,4                 |
| 11                                   | [4-F-Phe <sup>4</sup> ]-Leu-ENK  | 11,8                 |
| 12                                   | [4-Cl-Phe <sup>4</sup> ]-Leu-ENK | 12,6                 |
| 13                                   | [4-Br-Phe <sup>4</sup> ]-Leu-ENK | 13,2                 |
| 14                                   | [4-I-Phe <sup>4</sup> ]-Leu-ENK  | 14,4                 |

## HPLC of endomorphin-1 (1)

Sample Name: Muestra  
Injection from this vial: 1 of 1

Series:9864  
Vial Number: 1  
Volume: 30,0 ul

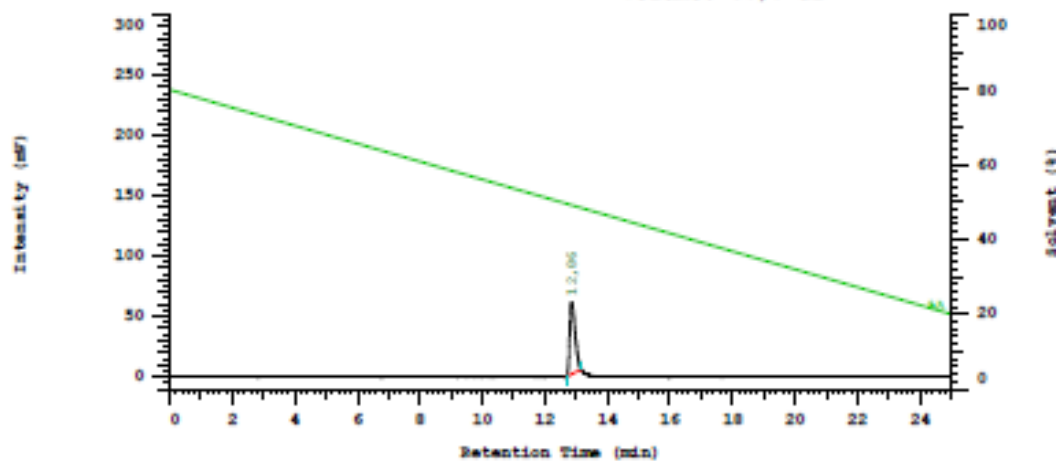

Pump A Type: L-6200  
Solvent A: Agua

Solvent B: ACN

## HPLC of [4-F-Phe<sup>4</sup>]-endomorphin-1 (2)

Sample Name: MR122VF13  
Injection from this vial: 1 of 1

Series:9892  
Vial Number: 1  
Volume: 30,0 ul

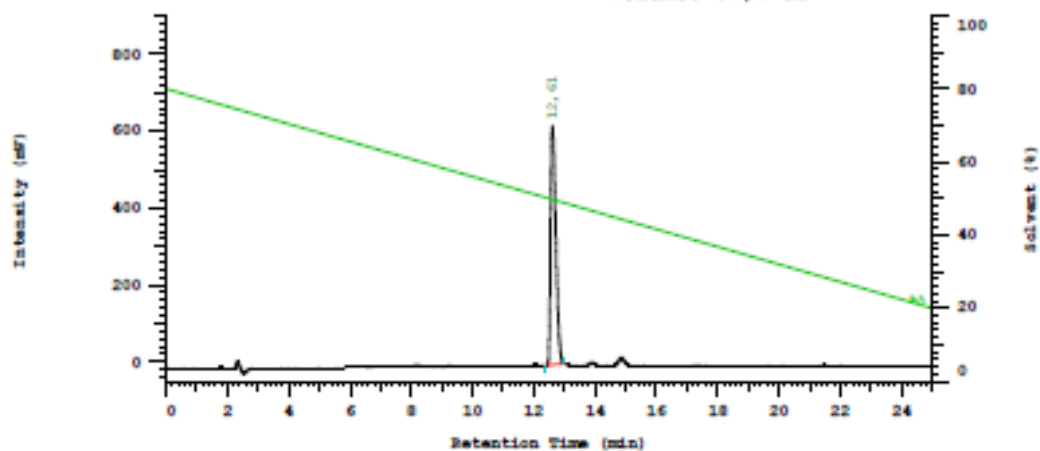

Pump A Type: L-6200  
Solvent A: Agua

Solvent B: ACN

### HPLC of [4-Cl-Phe<sup>4</sup>]-endomorphin-1 (3)

Sample Name: Muestra  
Injection from this vial: 1 of 1  
Series:9909  
Vial Number: 1  
Volume: 30,0 ul

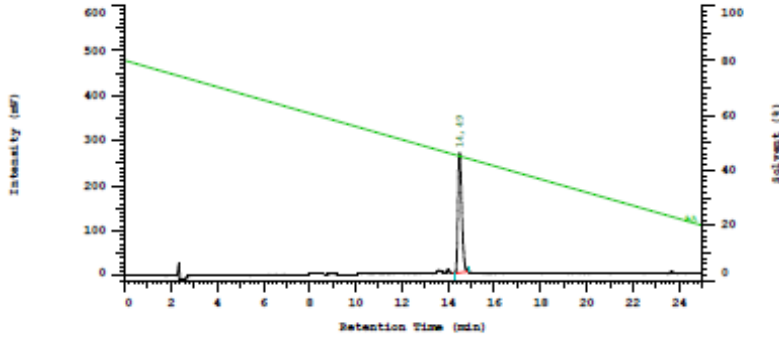

Pump A Type: L-6200  
Solvent A: Agua  
Solvent B: ACN

### HPLC of [4-Br-Phe<sup>4</sup>]-endomorphin-1 (4)

Sample Name: MR123VF13  
Injection from this vial: 1 of 1  
Series:9896  
Vial Number: 1  
Volume: 30,0 ul

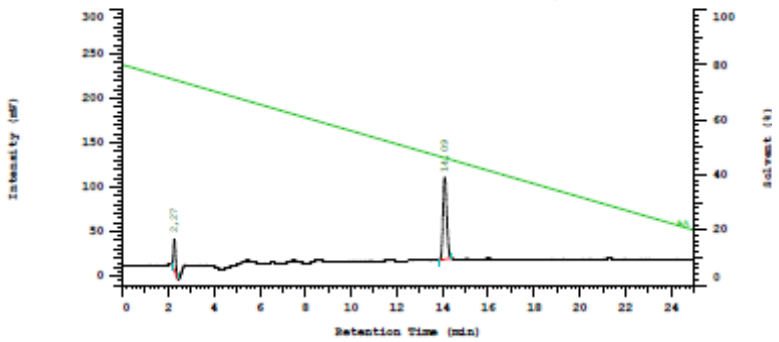

Pump A Type: L-6200  
Solvent A: Agua  
Solvent B: ACN

### HPLC of [4-I-Phe<sup>4</sup>]-endomorphin-1 (5)

Sample Name: Muestra  
Injection from this vial: 1 of 1  
Series:9911  
Vial Number: 1  
Volume: 30,0 ul

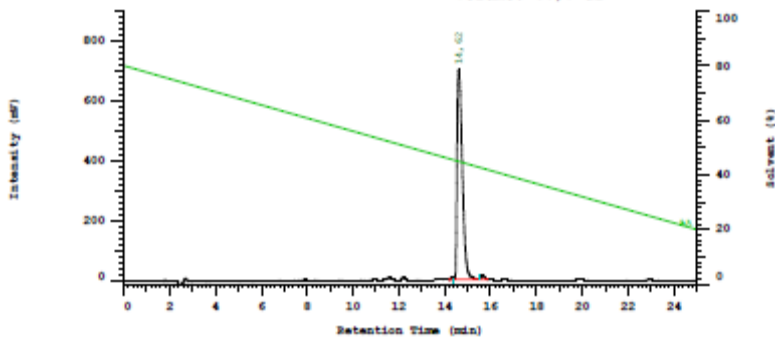

Pump A Type: L-6200  
Solvent A: Agua  
Solvent B: ACN



### UPLC of Leu-enkephalin (6)

8269 LeuENK  
230512.56

1: TOF MS ES+  
TIC  
2.45e5

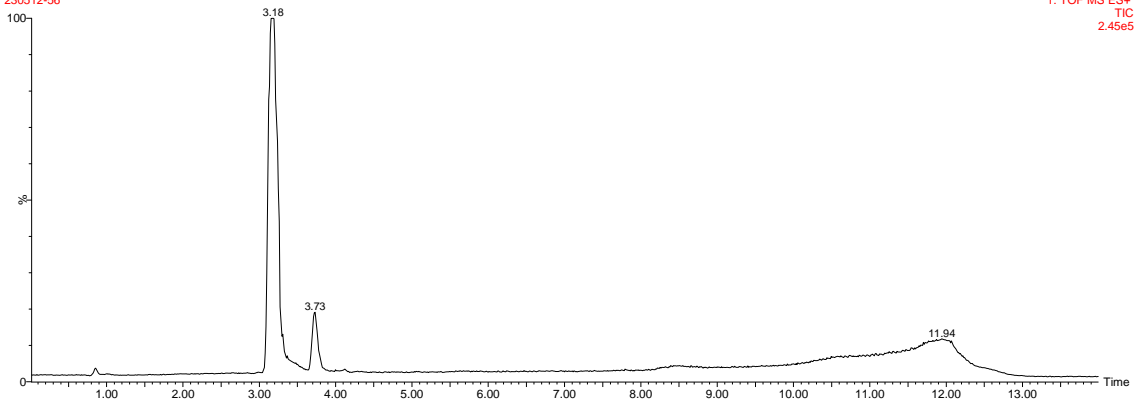

### HPLC of [2-F-Phe<sup>4</sup>]-Leu-ENK (7)

Sample Name: Muestra  
Injection from this vial: 1 of 1

Series:0496  
Vial Number: 1  
Volume: 30,0 ul

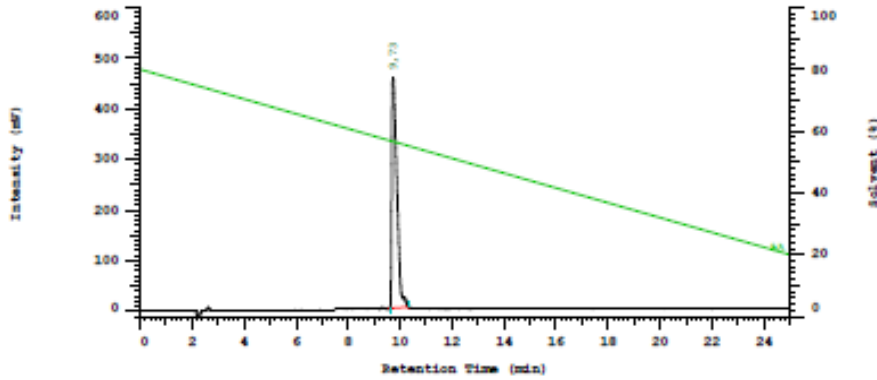

Pump A Type: L-6200  
Solvent A: Agua

Solvent B: ACN

### HPLC of [2-Cl-Phe<sup>4</sup>]-Leu-ENK (8)

Sample Name: Muestra  
Injection from this vial: 1 of 1

Series:0539  
Vial Number: 1  
Volume: 30,0 ul

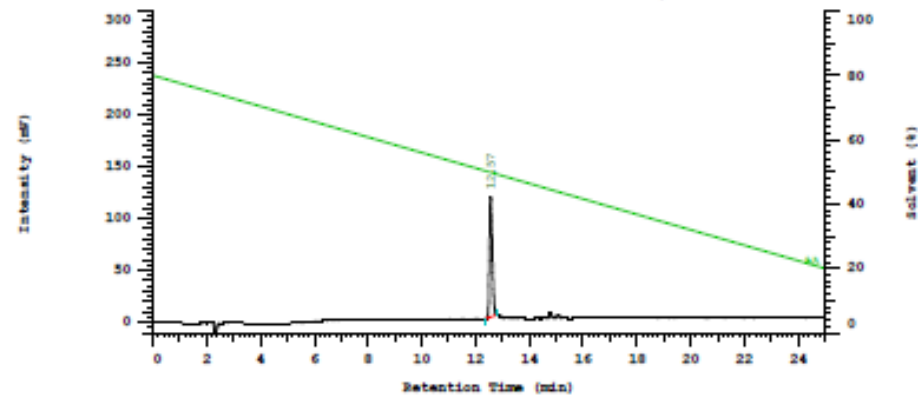

Pump A Type: L-6200  
Solvent A: Agua

Solvent B: ACN

### HPLC of [2-Br-Phe<sup>4</sup>]-Leu-ENK (9)

Sample Name: Muestra  
Injection from this vial: 1 of 1

Series:0542  
Vial Number: 1  
Volume: 30,0 ul

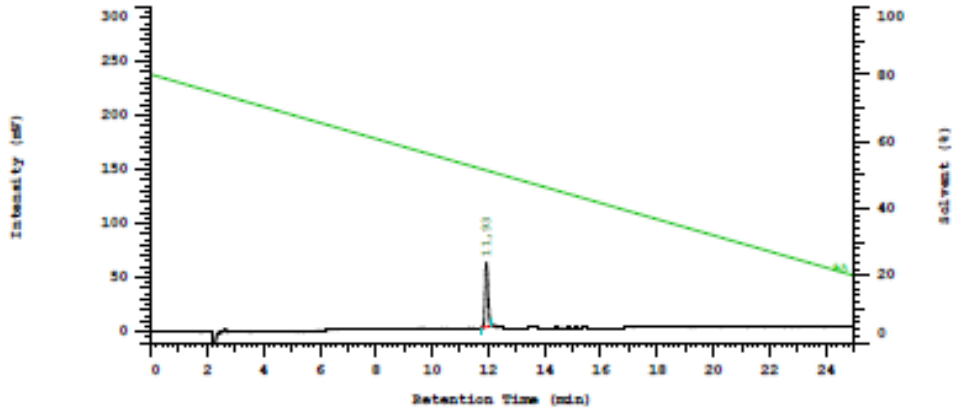

Pump A Type: L-6200  
Solvent A: Agua

Solvent B: ACN

### HPLC of [2-I-Phe<sup>4</sup>]-Leu-ENK (10)

Sample Name:  
Injection from this vial: 1 of 1

Series:5120  
Vial Number: 1  
Volume: 10,0 ul

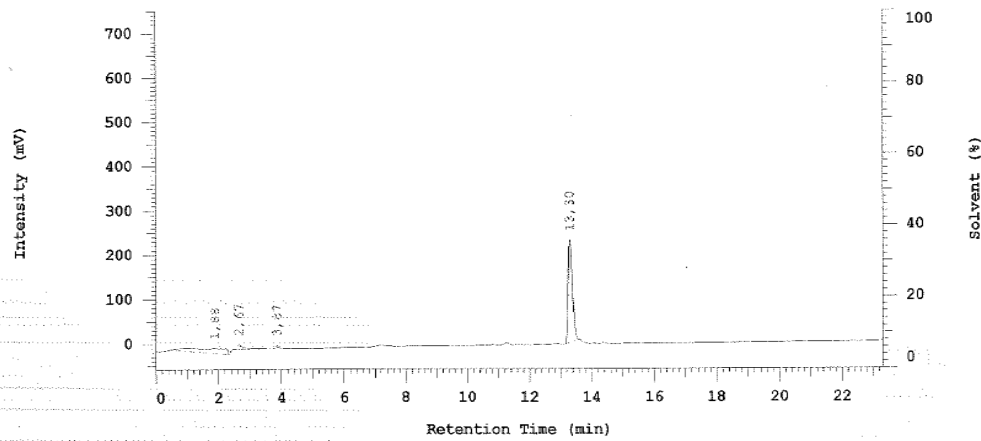

Pump A Type: L-6200  
Solvent A: Agua

Solvent B: Acetonitrilo

### HPLC of [4-F-Phe<sup>4</sup>]-Leu-ENK (11)

Sample Name: Muestra  
Injection from this vial: 1 of 1  
Series:0024  
Vial Number: 1  
Volume: 30,0 ul

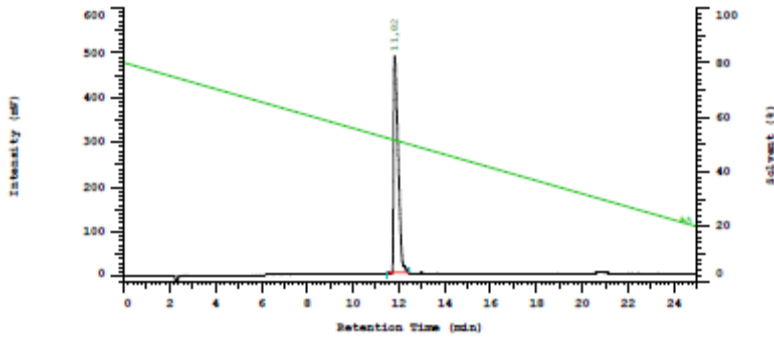

Pump A Type: L-6200  
Solvent A: Agua  
Solvent B: ACN

### HPLC of [4-Cl-Phe<sup>4</sup>]-Leu-ENK (12)

Sample Name: Muestra  
Injection from this vial: 1 of 1  
Series:0019  
Vial Number: 1  
Volume: 30,0 ul

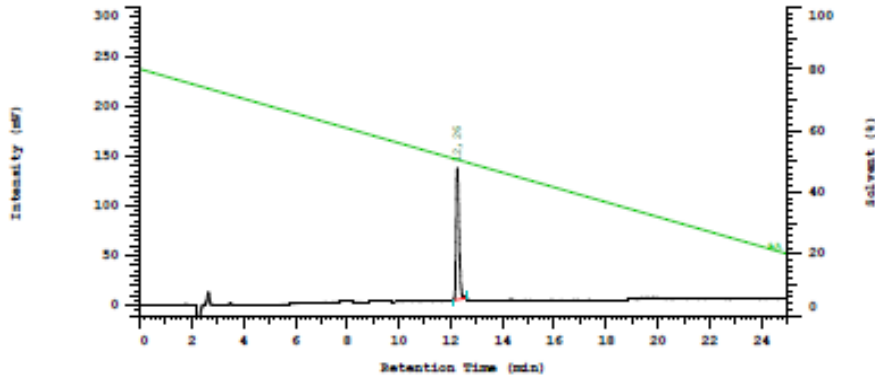

Pump A Type: L-6200  
Solvent A: Agua  
Solvent B: ACN

### HPLC of [4-Br-Phe<sup>4</sup>]-Leu-ENK (13)

Sample Name: Muestra  
Injection from this vial: 1 of 1  
Series:0039  
Vial Number: 1  
Volume: 30,0 ul

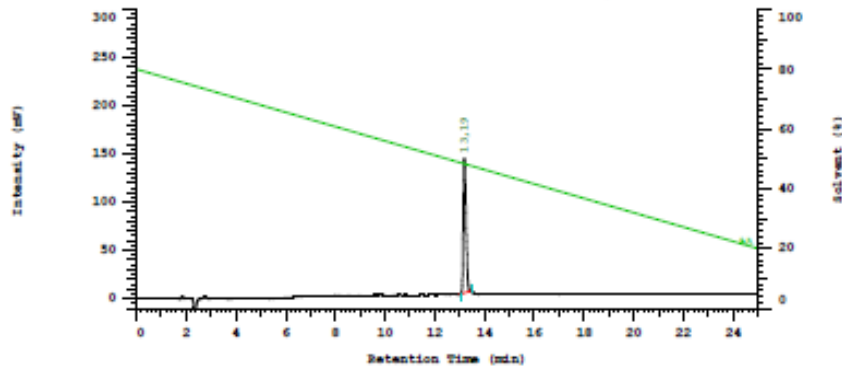

Pump A Type: L-6200  
Solvent A: Agua  
Solvent B: ACN

# HPLC of [4-I-Phe<sup>4</sup>]-Leu-ENK (14)

Sample Name: Muestra  
Injection from this vial: 1 of 1

Series:9974  
Vial Number: 1  
Volume: 30,0 ul

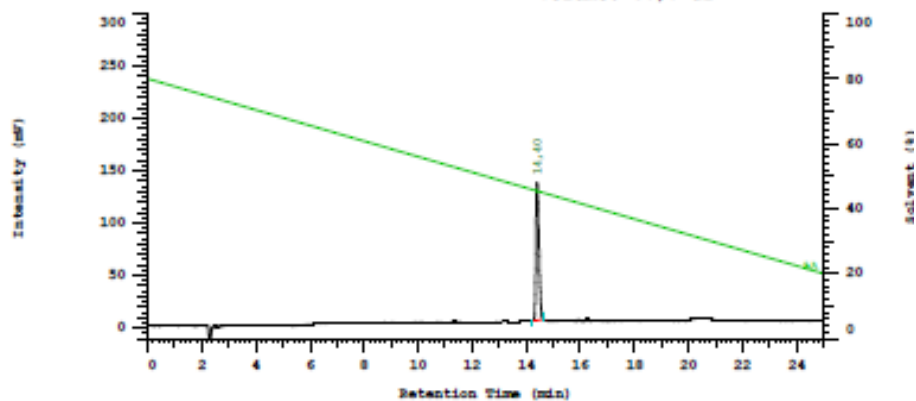

Pump A Type: L-6200  
Solvent A: Agua

Solvent B: ACN
